# Supplementary material for: Phenethyl isothiocyanate inhibits the carcinogenic properties of hepatocellular carcinoma Huh7.5.1 cells by activating MAPK/PI3K-Akt/p53 signaling pathways
Source: PeerJ. 2024 Jun 10;12:e17532. doi: 10.7717/peerj.17532 (PMC11172670; doi:10.7717/peerj.17532)
Supplement: Supplemental Information 1 [file peerj-12-17532-s001.xlsx]

## Sheet: Table S1
Table S1. List of primers used in qRT-PCR validation.
Genes	Forward primers (5’-3’)	Reverse primers (5’-3’)	References
FOS	CAAGCGGAGACAGACCAACT	GTGAGCTGCCAGGATGAACT	( Ma et al., 2023)
DDIT4	GGACCAAGTGTGTTTGTTGTTTG	CACCCACCCCTTCCTACTCTT	(Lin et al., 2021)
HBEGF	AGTTCTCTCGGCACTGGTGA	TAGCAGCTGGTCCGTGGAIA	(Ji et al., 2023)
ATF3	CTCCTGGGTCACTGGTGTTT	GCTACCTCGGCTTTTGTGAT	(Xu et al., 2023)
SOCS1	GACGCCTGCGGATTCTAC	AGCGGCCGGCCTGAAAG	(Zhang et al., 2018)
β-actin	CCTTCCTGGGCATGGAGTC	TGATCTTCATTGTGCTGGGTG	(Zeng et al., 2023)
PDE6G	GATGAAGCAGCGAGATAAAGGC	TTGGGGGCTTGCTCTTGAAC
MXD1	CGGGCTCATCTTCGCTTGT	GATTTGGTGAACGGCTTTTCTG
RGS16	ATCAGAGCTGGGCTGCGATA	CAGGTCGAACGACTCTCTCC
