# Supplementary material for: Phenethyl isothiocyanate inhibits the carcinogenic properties of hepatocellular carcinoma Huh7.5.1 cells by activating MAPK/PI3K-Akt/p53 signaling pathways
Source: PeerJ. 2024 Jun 10;12:e17532. doi: 10.7717/peerj.17532 (PMC11172670; doi:10.7717/peerj.17532)
Supplement: Supplemental Information 2 [file peerj-12-17532-s002.xlsx]

## Sheet: Table S2
Table S2. Differentially expressed genes identified in Huh7.5.1 cells treated with PEITC based on transcriptome sequencing.
Gene names	log2 (Fold change (FC))	p-value	Regulation
HSPA5	-1.2099	3.52187e-293	down
EGR1	2.58289	1.1772e-263	up
MT-RNR1	-1.21919	2.46579e-149	down
CYP1A1	-1.22307	3.06519e-146	down
ARRDC3	1.71847	5.62273e-122	up
TYW1B	2.58734	1.06532e-92	up
ENSG00000281383	1.35641	2.1642e-92	up
ENSG00000280441	2.58821	2.77786e-87	up
ENSG00000281181	1.13679	4.52736e-78	up
ENSG00000280800	1.08641	2.59068e-76	up
SRXN1	-1.20317	5.93793e-75	down
ENSG00000280614	1.11209	8.47605e-72	up
USPL1	1.77478	1.17952e-68	up
TOB2	1.10265	8.52777e-67	up
DKK1	-1.06203	2.00175e-65	down
BAG3	1.21509	1.33712e-63	up
BMF	-1.14595	1.44597e-52	down
SNAI1	1.48891	9.83171e-52	up
MT-TF	-2.21702	1.68425e-51	down
ID3	-1.03568	1.03091e-50	down
CLK1	1.31675	1.81042e-47	up
RSRP1	1.40392	2.82267e-46	up
HSPA1L	2.50418	1.07993e-44	up
PDK4	3.47902	2.76202e-44	up
NR4A2	1.44171	6.27773e-44	up
ENSG00000278996	2.52823	1.1657e-43	up
SOX5	1.10549	1.85621e-43	up
RNA5-8SN3	2.43897	2.97654e-40	up
SESN2	1.06199	1.38859e-39	up
FOS	1.94577	3.69665e-39	up
RNA5-8SN2	2.46401	4.6766e-39	up
FST	-1.19248	9.58573e-38	down
TENT5C	1.91463	4.0666e-37	up
BAGE2	1.67764	4.24668e-36	up
SNHG4	-1.31943	3.08853e-35	down
HERC2P3	1.51504	4.66018e-35	up
PPL	-1.20829	1.91389e-33	down
5_8S_rRNA	2.37972	2.64582e-32	up
LHFPL5	-3.81387	3.31986e-31	down
TOGARAM1	1.48895	4.20929e-31	up
FOSB	2.98056	3.2356e-30	up
RNA5-8SN1	2.38668	4.78982e-30	up
TBR1	8.81755	5.13365e-30	up
MT-TH	-1.87828	3.17131e-28	down
SLC25A25	1.00189	4.02976e-28	up
STAG3L5P-PVRIG2P-PILRB	1.04037	1.54971e-27	up
ENSG00000273840	1.4922	3.99628e-27	up
ZBED6	-1.31036	4.30392e-27	down
ZNF436	1.33043	1.40016e-26	up
HSPA6	4.33309	5.56934e-26	up
ALPK3	-1.37271	5.92622e-26	down
ATF3	1.33522	6.32902e-26	up
GCNT3	-1.14485	1.90505e-25	down
DLX2	2.34726	4.52785e-25	up
MXD1	1.27988	5.1262e-25	up
NR4A3	3.80922	6.74453e-25	up
FAM214A	1.08994	8.73771e-25	up
ENSG00000283103	-1.75993	1.42931e-24	down
CREBRF	1.85495	3.62714e-24	up
MT-TS2	-1.73447	7.78966e-24	down
LINC02481	3.67971	1.15575e-23	up
ENSG00000289901	-1.20886	1.4846e-23	down
H2BC21	1.26013	1.726e-23	up
KLRK1-AS1	-1.04588	1.74852e-23	down
ARID4A	1.00377	1.93352e-23	up
CCDC12	-1.0673	2.32957e-23	down
F2RL2	-1.45094	1.31384e-22	down
ENSG00000263826	-2.54999	1.55613e-22	down
H2BC20P	1.36303	3.74072e-22	up
PPM1D	1.05327	4.25335e-22	up
ELAPOR1	2.48889	5.38868e-22	up
ENSG00000258017	2.08754	6.59948e-22	up
SCAPER	1.11407	1.38607e-21	up
TBC1D10C	3.41382	2.01126e-21	up
SERTAD1	1.61786	2.20227e-21	up
ENSG00000273599	2.89422	2.6518e-21	up
MT-TL2	-1.53863	3.11557e-21	down
MIR22HG	-1.20463	4.03053e-21	down
RNU1-2	3.56942	5.93747e-21	up
ZNF425	1.64346	8.4846e-21	up
RNU1-4	3.5432	9.65535e-21	up
MAP3K14	1.29473	1.37771e-20	up
ENSG00000289720	3.64178	1.37205e-20	up
DDIT3	1.47635	1.55799e-20	up
MT-TT	-1.54022	4.19204e-20	down
MTMR11	2.56862	7.29712e-20	up
IKZF4	1.34738	8.66155e-20	up
MYLIP	1.61601	9.59548e-20	up
ZNF460	1.41381	1.2592e-19	up
PIM1	-1.01915	1.50506e-19	down
ENSG00000285565	15.5372	4.51044e-19	up
PARGP1	1.35235	7.79141e-19	up
DDR2	1.85676	7.98498e-19	up
LINC00691	4.66401	8.64271e-19	up
C2orf42	1.43101	1.59136e-18	up
MCEE	1.29691	1.6157e-18	up
ZNF483	2.84157	2.68189e-18	up
SMG1P3	1.39136	2.84255e-18	up
SMG1P4	1.40083	4.66063e-18	up
SDHAP1	1.04716	4.98512e-18	up
PIBF1	1.42069	5.6805e-18	up
TRIM73	3.39105	6.10391e-18	up
ENSG00000273295	1.74015	1.86313e-17	up
ZNF627	1.23655	2.85237e-17	up
ADM	1.16033	4.41072e-17	up
LINC01004	2.00841	4.44765e-17	up
SHISA7	4.90173	4.57503e-17	up
STARD4-AS1	-2.13472	5.68281e-17	down
NPAS4	5.23265	6.52943e-17	up
ZBTB49	1.53609	8.39596e-17	up
ETAA1	-1.46357	1.25932e-16	down
ARHGAP30	2.49669	1.26311e-16	up
NHLH1	4.92989	1.28842e-16	up
MED26	1.05992	1.39777e-16	up
IGFN1	-2.16134	1.53972e-16	down
ATF7IP2	1.13404	3.57459e-16	up
AKR1C2	-1.09803	3.85123e-16	down
UBD	-1.06333	5.47115e-16	down
RNU1-1	3.36833	8.00316e-16	up
RNU1-3	3.41099	1.19954e-15	up
RARB	1.8684	1.61138e-15	up
SPTBN1-AS2	-3.70282	2.07765e-15	down
HBEGF	1.24071	2.15969e-15	up
ENSG00000270020	6.20443	2.16306e-15	up
RGS2	1.05217	2.17061e-15	up
UBASH3B	-1.00529	2.31326e-15	down
ZYG11A	1.02499	2.37755e-15	up
CSPG5	2.91196	4.17901e-15	up
DDIT4	1.2317	4.21455e-15	up
TRIM46	4.27345	4.36901e-15	up
DLL4	2.47045	6.26792e-15	up
H2BC18	2.8308	7.88525e-15	up
LINC00672	3.20866	9.63783e-15	up
ZNF442	2.12337	1.09761e-14	up
ZNF844	1.26038	1.7815e-14	up
HSPA7	3.75226	2.1536e-14	up
NPTN-IT1	-2.99506	2.64012e-14	down
PRSS23	-1.02405	3.2717e-14	down
BNIPL	3.30147	3.60833e-14	up
SELPLG	5.19638	5.65803e-14	up
EDN1	-1.58217	6.56567e-14	down
RIPK4	1.14945	6.61154e-14	up
MT-TK	2.00131	7.49088e-14	up
ENSG00000289486	2.5374	8.6982e-14	up
ENSG00000264577	-1.84631	1.13732e-13	down
NADK2-AS1	-2.9302	2.35554e-13	down
NUTM2E	1.55357	2.80981e-13	up
MUC20P1	2.41761	3.43849e-13	up
SUZ12P1	1.19053	3.97205e-13	up
ZNF546	1.83087	6.42239e-13	up
HAS3	1.94294	7.2448e-13	up
FAM83C	6.27706	7.32012e-13	up
MIR130AHG	2.86705	8.5919e-13	up
IFITM10	2.82055	9.8856e-13	up
CCT6P1	1.22553	1.00084e-12	up
LINC02582	-3.07127	1.30109e-12	down
ENSG00000230551	-1.25679	1.31184e-12	down
ENSG00000287088	12.9636	1.46459e-12	up
GUSBP14	1.27243	2.12032e-12	up
ENSG00000285796	1.46637	3.22132e-12	up
RABGAP1L	1.01047	3.90582e-12	up
CFAP65	10.5729	4.1561e-12	up
PLA2G4C	2.1742	4.78513e-12	up
SMG1P6	1.71321	4.85354e-12	up
GPR179	3.21809	5.62024e-12	up
GCM1	3.24172	5.71812e-12	up
SLFNL1-AS1	-1.8358	7.77332e-12	down
ATP1A1-AS1	-1.3941	8.4808e-12	down
BTLA	4.22091	8.55656e-12	up
DALRD3	1.31998	8.66144e-12	up
TCTE1	12.2642	9.81451e-12	up
HSD17B7P2	1.88694	9.90747e-12	up
ENSG00000261924	3.10198	1.26926e-11	up
LINC01234	2.5415	2.09997e-11	up
CDC42-AS1	-2.98564	2.3248e-11	down
DNAH14	1.00653	2.50808e-11	up
ZBTB47-AS1	-2.8472	2.6692e-11	down
SMG1P5	1.13714	2.85701e-11	up
GTF2IRD2B	1.32364	2.89425e-11	up
ADA2	3.65097	3.066e-11	up
GOLGA6C	5.4168	3.06202e-11	up
SIX4	1.07146	3.74177e-11	up
OR2I1P	-1.74169	3.80384e-11	down
PRDM1	1.24356	3.90877e-11	up
SARM1	1.01501	4.27268e-11	up
ENSG00000267122	4.4575	4.40727e-11	up
MSTN	5.97689	4.40476e-11	up
ENSG00000233030	11.895	4.5927e-11	up
FAM238C	2.95116	4.80569e-11	up
KANK4	1.11482	5.23059e-11	up
ENSG00000230495	5.21376	5.30194e-11	up
POLR2J4	1.10866	5.59236e-11	up
TTLL3	1.24357	7.29605e-11	up
UCP3	2.46113	7.42355e-11	up
LUCAT1	-1.48311	8.1373e-11	down
PDE4DIPP2	1.03245	8.54587e-11	up
EFNA4	-1.02241	8.99982e-11	down
GEMIN6	-1.03101	9.3177e-11	down
CATSPERG	10.3564	1.05134e-10	up
ENSG00000271880	11.9549	1.05856e-10	up
KCNT2	1.27271	1.07148e-10	up
DCLK3	11.0319	1.18845e-10	up
ENSG00000249695	11.1644	1.19354e-10	up
SRMS	3.54949	1.19544e-10	up
LY6G5B	-1.48722	1.29305e-10	down
SMG1P2	1.23183	1.37236e-10	up
ZNF57	1.11808	1.54069e-10	up
MT-TV	-1.04139	1.55959e-10	down
FBXO24	2.92823	1.73697e-10	up
WDR47	1.25291	1.84438e-10	up
G6PC2	11.9174	1.87043e-10	up
WAS	2.23708	2.09013e-10	up
NAGS	1.10609	2.3001e-10	up
GAL3ST4	3.29422	2.55077e-10	up
FBXO48	1.81547	2.62721e-10	up
THAP2	1.31694	2.97725e-10	up
NFATC2IP-AS1	-1.53888	2.99152e-10	down
SPDYE21	3.14818	2.98765e-10	up
CPEB3	1.84653	3.53763e-10	up
ENSG00000261654	1.90924	3.57475e-10	up
LEP	11.6261	3.66536e-10	up
ENSG00000286000	4.84775	4.02003e-10	up
EGR2	2.9775	4.20771e-10	up
MYBL1	1.05478	4.27579e-10	up
CLDN5	11.5813	4.61224e-10	up
DUOX2	3.20121	5.096e-10	up
SCN4A	10.3769	5.40012e-10	up
CDC14A	1.26632	5.47907e-10	up
ENSG00000251615	2.16359	5.53546e-10	up
ZNF490	1.13072	5.57797e-10	up
GPC1-AS1	5.68894	5.89274e-10	up
MYCBPAP	10.6109	6.22833e-10	up
CABP4	4.31104	6.27777e-10	up
MIR17HG	-2.92198	7.50379e-10	down
ENSG00000270149	14.8231	9.7873e-10	up
ENSG00000288852	2.15172	1.004e-09	up
RALY-AS1	1.12159	1.01256e-09	up
BTK	5.53167	1.01435e-09	up
NEUROD2	10.7875	1.02513e-09	up
ENSG00000288079	11.0987	1.0912e-09	up
PTGER3	7.05685	1.2226e-09	up
GPRASP1	1.87254	1.28935e-09	up
TRIM64DP	12.6309	1.36611e-09	up
PNLDC1	3.02726	1.41267e-09	up
ENSG00000288632	1.84152	1.45522e-09	up
TSPAN31	1.03621	1.46674e-09	up
CA5A	1.11797	1.56544e-09	up
PPP1R3C	1.45696	1.6101e-09	up
SLC2A9	3.19968	1.63559e-09	up
ASNSP1	1.34139	1.73974e-09	up
MYO15B	1.91298	1.7711e-09	up
H2BC15	1.54704	1.85915e-09	up
ZNF597	1.06581	1.92079e-09	up
CILP2	3.07357	1.95944e-09	up
GOLGA6D	4.58701	2.03053e-09	up
MUC20	2.6802	2.12198e-09	up
FAM83E	2.29998	2.21767e-09	up
PCGF1	1.05043	2.29446e-09	up
SGPP2	-1.03323	2.38041e-09	down
ZNF296	1.2877	2.40851e-09	up
ADCY10	2.01532	3.02944e-09	up
ENSG00000275897	4.06665	3.16531e-09	up
MUC4	4.7633	3.53504e-09	up
NUTM2D	1.01583	3.54192e-09	up
ENSG00000285649	3.78191	3.61722e-09	up
LBHD1	1.48519	3.86512e-09	up
RAET1K	2.0334	3.87828e-09	up
ENSG00000287934	-2.331	4.18178e-09	down
MYO1A	1.26943	4.21283e-09	up
ISY1-RAB43	-11.6399	4.3542e-09	down
NR2E1	11.147	4.42676e-09	up
VEGFD	2.3338	4.57632e-09	up
PAX8	-1.52216	4.7335e-09	down
LHX4	-1.57051	5.06064e-09	down
SOST	11.8483	5.40391e-09	up
RADIL	4.64572	5.43126e-09	up
PYGM	3.17452	5.86354e-09	up
BEST2	6.02328	5.91288e-09	up
RPL17-C18orf32	-12.9882	6.62964e-09	down
ENSG00000267523	-2.35761	6.69395e-09	down
MAILR	3.5534	6.80046e-09	up
OR5BA1P	5.417	6.90714e-09	up
GOLGA7B	4.81601	7.23368e-09	up
ENSG00000284633	10.7238	7.34875e-09	up
ENSG00000100101	-11.2086	7.68397e-09	down
PCAT19	9.95299	8.40583e-09	up
TNFRSF9	-1.4796	8.51682e-09	down
H3C12	13.2082	8.5235e-09	up
ENSG00000236364	-3.53645	8.75229e-09	down
ENSG00000268083	14.3766	9.27943e-09	up
MIF-AS1	1.24718	9.56956e-09	up
PIANP	2.6993	9.75397e-09	up
MT-TG	-1.03404	1.05221e-08	down
LTA	5.84267	1.11186e-08	up
GRB7	1.54367	1.19135e-08	up
INSIG1-DT	2.16505	1.25985e-08	up
ENSG00000224097	3.71759	1.32462e-08	up
GKN2	13.5072	1.32407e-08	up
ENSG00000254701	1.63411	1.35716e-08	up
ENSG00000276672	-1.11053	1.40512e-08	down
ACTA1	3.36998	1.42634e-08	up
ENSG00000287067	11.3146	1.44314e-08	up
ZNF843	10.6797	1.52506e-08	up
BORCS8-MEF2B	3.97808	1.59067e-08	up
PTK6	2.53968	1.69075e-08	up
GOLGA6A	3.84567	1.91328e-08	up
RBFOX3	9.49412	2.23076e-08	up
LSMEM2	4.17908	2.27239e-08	up
ALOX12P2	1.02619	2.3084e-08	up
IQSEC3	9.93612	2.36612e-08	up
SIGLEC1	9.79304	2.3719e-08	up
ENSG00000249624	4.62379	2.4745e-08	up
ENSG00000271793	10.5625	2.64819e-08	up
PCOLCE-AS1	5.98364	2.67023e-08	up
INPP5D	9.69784	2.69671e-08	up
CEP162	1.09182	2.77218e-08	up
SCTR-AS1	11.1564	2.87186e-08	up
TRIM40	11.4656	2.92628e-08	up
ZNF280A	1.38711	3.03879e-08	up
ENSG00000288919	2.66317	3.15381e-08	up
RN7SK	2.32303	3.34679e-08	up
NWD1	9.57593	3.50531e-08	up
ENSG00000269711	13.6269	4.20749e-08	up
ENSG00000286391	11.2188	4.2621e-08	up
PDE6G	12.6229	4.35839e-08	up
DLGAP1-AS1	-1.21505	4.52184e-08	down
PLEK	5.52477	4.52328e-08	up
ENSG00000253965	11.4517	4.62519e-08	up
EFNB2	1.41367	4.66627e-08	up
ENSG00000254510	11.5628	4.67891e-08	up
ENSG00000236283	1.45671	4.73031e-08	up
ANKRD26P1	5.38868	5.06175e-08	up
KCNG3	1.75434	5.26702e-08	up
GADD45G	1.91662	5.28927e-08	up
GOLGA6B	8.04149	5.32056e-08	up
SOCS6P1	12.1277	5.37562e-08	up
ENSG00000287054	5.84769	5.56037e-08	up
ENSG00000285625	15.1938	6.38752e-08	up
DZIP1L	1.3749	6.78376e-08	up
PCDHB1-AS1	-5.107	7.04752e-08	down
TIAM2	1.00068	7.12718e-08	up
MAP3K15	1.21459	7.45152e-08	up
ENSG00000287534	11.1818	7.45753e-08	up
CHKA-DT	2.8307	7.77338e-08	up
ENSG00000287535	4.30905	7.93407e-08	up
ZSCAN10	10.9541	7.95849e-08	up
ENSG00000286207	-1.18577	8.12178e-08	down
H3C6	1.52902	8.61146e-08	up
ENSG00000262691	4.17722	8.60087e-08	up
MOBP	9.41208	8.74341e-08	up
RFPL1S	4.3378	8.81289e-08	up
SPDYE7P	6.45178	9.10648e-08	up
ZNF821	1.38502	9.5732e-08	up
ENSG00000228144	12.6761	9.97485e-08	up
ENSG00000224794	11.7631	1.02492e-07	up
OR9G1	10.7762	1.04281e-07	up
H2BU1	1.98201	1.09111e-07	up
C1orf167	9.85319	1.16918e-07	up
GMNC	1.8887	1.27072e-07	up
WNT3A	10.998	1.26982e-07	up
RPS2P1	12.8655	1.31207e-07	up
ENSG00000285943	1.0685	1.31778e-07	up
ENSG00000280367	3.17197	1.35781e-07	up
REG1A	11.6837	1.40485e-07	up
GRIN2C	2.38122	1.50364e-07	up
ENSG00000285338	12.1171	1.5387e-07	up
ASCL1	5.30719	1.58202e-07	up
ENSG00000197332	1.53028	1.6514e-07	up
ENSG00000287735	-4.93355	1.65948e-07	down
GDF9	2.70874	1.70105e-07	up
CHRNA2	3.81183	1.73191e-07	up
HADHAP1	3.53015	1.79248e-07	up
ENSG00000287299	-2.56945	1.81323e-07	down
LINC01346	10.1994	1.85848e-07	up
HOXA5	2.13613	1.86134e-07	up
CSF1R	3.47674	1.86322e-07	up
ENSG00000279088	-1.35155	1.95933e-07	down
LCNL1	10.5245	1.97105e-07	up
TMPRSS12	10.8413	2.04435e-07	up
ENSG00000280195	-1.49514	2.08512e-07	down
EPHA8	10.0778	2.2757e-07	up
SELE	4.68774	2.46611e-07	up
GPR83	3.88381	2.49292e-07	up
ENSG00000279794	-2.37218	2.58286e-07	down
LINC02818	4.88861	2.61725e-07	up
ENSG00000254536	-1.93992	2.62443e-07	down
H3C15	2.91922	2.72607e-07	up
ENSG00000283078	3.29068	2.78068e-07	up
NFYAP1	1.90701	2.80929e-07	up
PTCH2	2.16594	2.92811e-07	up
ENSG00000278952	2.59371	2.95024e-07	up
DLGAP1-AS2	-1.24598	3.04992e-07	down
DNAJB5-DT	12.859	3.10123e-07	up
ENSG00000287089	11.2961	3.40535e-07	up
PILRA	2.70706	3.45124e-07	up
ENSG00000279641	2.90271	3.54994e-07	up
PGA3	10.312	3.69518e-07	up
ENSG00000289829	2.64943	3.75203e-07	up
MYO15A	2.92123	3.82219e-07	up
SMTNL1	11.6835	3.9978e-07	up
H4C5	2.89825	4.01839e-07	up
RUBCNL	1.17806	4.05195e-07	up
TECTA	1.83143	4.07806e-07	up
SPI1	11.5917	4.11575e-07	up
ELOA3DP	4.30995	4.21031e-07	up
ENSG00000255931	11.6688	4.44039e-07	up
ACHE	1.80587	4.67863e-07	up
C5AR1	3.65538	4.99254e-07	up
EGR3	2.75288	5.57122e-07	up
KCNH3	3.42752	5.83391e-07	up
SPP1	-1.11965	5.87613e-07	down
LAMTOR5-AS1	1.40249	5.88844e-07	up
TPRX1	11.2895	5.98875e-07	up
ENSG00000260729	3.23928	6.28702e-07	up
ENSG00000278638	4.97063	6.35332e-07	up
ENSG00000262580	1.30074	6.3769e-07	up
CARD14	2.19032	6.68909e-07	up
ENSG00000260604	-1.51148	6.7046e-07	down
CD27-AS1	1.8596	7.16085e-07	up
NPIPB9	2.53961	7.96734e-07	up
ENSG00000236501	9.52608	8.24753e-07	up
METTL21C	11.6494	8.36992e-07	up
RIN1	1.27997	8.52153e-07	up
BOLA2P2	-3.90935	8.60277e-07	down
LINC01058	11.6559	8.59726e-07	up
TTLL13	4.52322	9.20655e-07	up
SLC25A5-AS1	-2.18633	9.40232e-07	down
ENSG00000264177	10.0929	9.44146e-07	up
ENSG00000283743	10.3634	9.66205e-07	up
ENSG00000285877	2.9003	9.98261e-07	up
ENSG00000288826	2.31486	1.00476e-06	up
ENSG00000270050	6.2418	1.04309e-06	up
IRS2	1.29035	1.04657e-06	up
PRPF19-DT	2.8087	1.05028e-06	up
HIGD2AP1	13.9014	1.09334e-06	up
GIMAP8	10.2561	1.09485e-06	up
NUTM2B	1.46347	1.11583e-06	up
TMED2-DT	1.70796	1.1579e-06	up
TRIM17	1.77168	1.16437e-06	up
ELDR	3.58432	1.18383e-06	up
FOXF1	10.466	1.22669e-06	up
IKZF3	4.10052	1.24125e-06	up
CDKL3	1.97707	1.24214e-06	up
H3C14	2.77768	1.26518e-06	up
REM2	11.0486	1.27286e-06	up
LINC01089	1.33754	1.28128e-06	up
MGAT4EP	6.22993	1.29288e-06	up
CES4A	4.81026	1.30106e-06	up
SAXO2	2.75044	1.32163e-06	up
BAIAP2L2	1.03875	1.38569e-06	up
GOLGA6FP	10.2769	1.39335e-06	up
ENSG00000279530	-3.11995	1.42483e-06	down
IRF5	2.22847	1.50902e-06	up
SLC6A1	2.07876	1.526e-06	up
OSM	11.084	1.56262e-06	up
ENSG00000237210	6.32129	1.56683e-06	up
ENSG00000270890	-2.55871	1.67098e-06	down
TG	1.94672	1.6725e-06	up
DBH-AS1	1.02458	1.69722e-06	up
ENSG00000276337	2.95553	1.71026e-06	up
ENSG00000279759	-1.17995	1.748e-06	down
JAKMIP2	1.55234	1.83873e-06	up
CATSPERE	9.99096	1.91967e-06	up
ENSG00000285492	8.48538	1.92669e-06	up
IGSF22	9.90673	1.94305e-06	up
TMEM51-AS1	1.09832	1.94509e-06	up
BEND4	9.0249	1.9778e-06	up
ZSCAN5A-AS1	3.43995	1.98194e-06	up
HAP1	1.40801	2.02086e-06	up
GPR152	6.24673	2.06361e-06	up
H3C2	2.32857	2.07484e-06	up
TTC41P	2.50718	2.07971e-06	up
WDR38	11.7253	2.14982e-06	up
PCDH19	2.61399	2.22025e-06	up
WFIKKN2	4.77895	2.25207e-06	up
ADRA2A	5.82179	2.32768e-06	up
TRIM72	9.13775	2.32874e-06	up
HAPLN3	2.39754	2.40361e-06	up
ENSG00000286562	12.8187	2.51093e-06	up
FCGR1A	6.07809	2.63554e-06	up
ENSG00000259422	4.5378	2.68428e-06	up
CYP3A7-CYP3A51P	11.6979	2.77329e-06	up
MCHR1	4.33061	2.78754e-06	up
CXCL6	-1.13007	2.79607e-06	down
SLC17A6	10.0255	2.83016e-06	up
PCDHGB2	-1.70423	2.84361e-06	down
MRGPRE	10.0927	2.86772e-06	up
ENSG00000286543	3.82795	2.95655e-06	up
TAC3	2.51481	3.2685e-06	up
ENSG00000258525	-1.53522	3.42429e-06	down
CCDC121	1.23718	3.65817e-06	up
LINC01620	11.1798	3.68299e-06	up
CBFA2T3	9.50142	3.71628e-06	up
ENSG00000287853	4.3334	3.80444e-06	up
YPEL4	1.55881	3.89424e-06	up
ARNTL	1.20454	3.93778e-06	up
ENSG00000290017	11.8226	4.0194e-06	up
MT-TW	1.73361	4.21851e-06	up
LINC01962	9.79383	4.28365e-06	up
CEP164P1	-9.83469	4.31268e-06	down
OSCP1	2.0165	4.37055e-06	up
CFAP99	9.72018	4.42587e-06	up
GEM	1.13594	4.62878e-06	up
ENSG00000289182	11.6478	4.68853e-06	up
ALDH3B1	1.0145	4.7627e-06	up
FAM167B	12.093	4.84551e-06	up
ENSG00000284830	3.62479	4.90224e-06	up
LTBP2	1.3599	4.98962e-06	up
AREG	-1.02536	5.06553e-06	down
PRDM7	9.86117	5.56872e-06	up
ZNF77	1.06	5.6067e-06	up
TNXB	2.15101	5.98143e-06	up
RXFP3	4.74067	6.04105e-06	up
ENSG00000159239	9.17219	6.14368e-06	up
B3GNT6	10.6372	6.35617e-06	up
ENSG00000267904	-1.94552	6.73179e-06	down
ENSG00000228302	-3.63412	7.04431e-06	down
DDN	1.22948	7.06464e-06	up
TUBA4B	11.1747	7.06097e-06	up
CTRB1	10.8799	7.14296e-06	up
OSER1-DT	1.04799	7.45935e-06	up
TEKT2	3.15062	7.48242e-06	up
PTPN5	9.47527	7.87566e-06	up
HTT-AS	5.11595	7.98589e-06	up
ENSG00000280334	10.4954	8.00594e-06	up
ENSG00000251448	10.5291	8.00324e-06	up
SH2D3C	2.88928	8.03737e-06	up
ENSG00000261889	4.39587	8.1705e-06	up
ICAM5	1.87195	8.23037e-06	up
KRT18P40	11.3561	8.70711e-06	up
SPDYA	2.77402	8.74552e-06	up
ENSG00000283064	3.3436	8.8177e-06	up
DNAJB7	-10.5914	8.95151e-06	down
C2orf78	10.3261	8.95463e-06	up
FOXH1	10.9573	9.13415e-06	up
H2BC17	2.28012	9.22203e-06	up
NKPD1	2.68743	9.32748e-06	up
PZP	2.45679	9.3796e-06	up
HSPD1P10	3.96907	9.80638e-06	up
CD27	3.95643	1.01315e-05	up
MPIG6B	2.46767	1.03364e-05	up
HSPA8P14	11.023	1.03367e-05	up
HIF1A-AS3	-1.92628	1.05151e-05	down
FBXO32	1.91452	1.0626e-05	up
STAG1-DT	3.35041	1.11806e-05	up
ENSG00000280138	1.54693	1.12962e-05	up
TEX45	10.3228	1.17304e-05	up
PRCD	3.59995	1.17449e-05	up
KATNAL2	1.08497	1.20676e-05	up
NTF3	1.58255	1.25543e-05	up
DNAI4	1.60703	1.25495e-05	up
GLYATL3	10.6848	1.30455e-05	up
LINC02631	10.5266	1.31442e-05	up
ENSG00000269044	-1.41524	1.33082e-05	down
DNM1P46	1.90605	1.33342e-05	up
ENSG00000258203	11.7731	1.34322e-05	up
ZNF778-DT	1.00574	1.36003e-05	up
ENSG00000270157	-1.46411	1.36376e-05	down
TBC1D3P5	9.57923	1.37102e-05	up
MAPK8IP2	1.2959	1.37647e-05	up
PKD1L3	5.8947	1.38555e-05	up
ENSG00000228925	-4.19195	1.42887e-05	down
WNT9B	1.03762	1.42938e-05	up
TCP10L3	8.6433	1.44025e-05	up
HCP5	3.40999	1.44483e-05	up
GJD4	11.0946	1.44535e-05	up
ENSG00000284700	11.729	1.44917e-05	up
SLC9A5	2.47682	1.46315e-05	up
FNDC7	3.6126	1.47313e-05	up
CNTF	-1.49625	1.50856e-05	down
ENSG00000256407	9.81665	1.50876e-05	up
CYP2B7P	2.5871	1.54687e-05	up
TMEM151A	1.18676	1.55345e-05	up
PYROXD2	2.55097	1.56737e-05	up
ENSG00000287170	2.86218	1.56789e-05	up
LINC02340	11.6517	1.60605e-05	up
GABRR2	1.60696	1.60925e-05	up
RPL7AP16	2.39997	1.6601e-05	up
MN1	1.83992	1.74218e-05	up
ENSG00000260597	-1.51635	1.77394e-05	down
TAGLN3	11.0593	1.81153e-05	up
ENSG00000280062	10.5202	1.83884e-05	up
KCNH4	9.87041	1.85495e-05	up
H2BC6	2.30279	1.85896e-05	up
CACNA1B	8.4768	1.88556e-05	up
HOXA-AS3	2.44025	1.95694e-05	up
ENSG00000271500	5.91599	1.97693e-05	up
BTN1A1	5.66907	2.03832e-05	up
PTPN22	5.91464	2.21394e-05	up
CRISPLD2	1.30014	2.25242e-05	up
ATP13A3-DT	1.41553	2.26411e-05	up
ENSG00000287633	10.1074	2.29115e-05	up
TMPRSS11BNL	9.56847	2.3078e-05	up
H2AC13	1.68596	2.32273e-05	up
IMPDH1P5	-1.95791	2.367e-05	down
FDPSP3	4.19252	2.39288e-05	up
TAS1R1	10.3416	2.39256e-05	up
UNC13C	1.77346	2.39615e-05	up
FAM163B	10.1768	2.41422e-05	up
CXCL8	-2.08573	2.4412e-05	down
CNR2	9.41435	2.47602e-05	up
ENSG00000279762	2.11824	2.51666e-05	up
CRX	9.27358	2.54301e-05	up
CIITA	-1.45287	2.55094e-05	down
SLC8A2	4.06462	2.55517e-05	up
ESRRB	2.6293	2.56609e-05	up
ENSG00000267130	-12.9179	2.59481e-05	down
ENSG00000285608	-12.6144	2.6072e-05	down
CRYBA2	11.0669	2.61957e-05	up
RPL12P37	5.95584	2.82103e-05	up
KCP	1.6741	2.87705e-05	up
ENSG00000255566	-12.5386	2.91007e-05	down
SEZ6	3.64711	2.93442e-05	up
LHX1-DT	2.13979	2.96344e-05	up
ADGRD2	9.12612	2.96761e-05	up
TAPBPL	1.38055	3.02883e-05	up
ACAP1	2.96696	3.03042e-05	up
ENSG00000229839	10.8164	3.05496e-05	up
ENSG00000286181	9.70129	3.10761e-05	up
CUX2	4.52764	3.12199e-05	up
ENSG00000262140	11.9174	3.14325e-05	up
LINC02408	10.1428	3.18055e-05	up
SEMA3F-AS1	-2.159	3.22555e-05	down
ZFP91-CNTF	12.8452	3.27053e-05	up
PMS2P3	1.08213	3.36949e-05	up
TTC24	9.7837	3.43235e-05	up
SOCS3	1.01006	3.50433e-05	up
TNFSF4	1.06571	3.55221e-05	up
IFITM1	-2.70604	3.57718e-05	down
MRC1	3.29586	3.59926e-05	up
SLC16A11	3.51611	3.663e-05	up
CARNS1	1.95606	3.76336e-05	up
ENSG00000254718	5.84531	3.79024e-05	up
LHX5-AS1	10.0506	3.82526e-05	up
KIRREL1	-1.12108	3.85282e-05	down
PIPOX	1.5107	3.91386e-05	up
FITM1	3.19454	3.9165e-05	up
RLIMP1	10.9027	3.94368e-05	up
OR7E104P	2.54588	3.97179e-05	up
ENSG00000279699	4.31792	4.01061e-05	up
ENSG00000218520	11.7292	4.0326e-05	up
ODAD4	1.84522	4.0553e-05	up
TRIM64EP	11.2481	4.09475e-05	up
FAM183BP	1.86616	4.09975e-05	up
TULP2	4.60791	4.14901e-05	up
LETM2	1.56103	4.16858e-05	up
ENSG00000252690	-1.68239	4.17514e-05	down
SPEG	2.37099	4.17846e-05	up
GAS2L2	4.49048	4.24287e-05	up
H2BC7	2.34501	4.29717e-05	up
FAM131A	1.06068	4.30265e-05	up
HNRNPA1P38	11.7208	4.30285e-05	up
ENSG00000260120	10.6839	4.31553e-05	up
ENSG00000257894	2.7194	4.33061e-05	up
RASGRP2	1.28736	4.45983e-05	up
OTP	9.96119	4.48145e-05	up
NPIPB2	1.7432	4.5137e-05	up
ENSG00000257761	4.17831	4.67805e-05	up
GLRA4	8.69514	4.7538e-05	up
TUBB8P7	4.6281	4.89105e-05	up
DCAF4L1	1.73873	5.00938e-05	up
PNCK	9.21226	5.07224e-05	up
ENSG00000269243	-9.50003	5.1463e-05	down
GPR156	2.18172	5.16247e-05	up
C2orf66	11.2041	5.21046e-05	up
BMS1P4-AGAP5	1.15164	5.28299e-05	up
KCNJ13	4.91572	5.32856e-05	up
NPIPB8	1.52898	5.39254e-05	up
C9orf24	2.43284	5.51369e-05	up
DGCR5	1.21519	5.68582e-05	up
ENSG00000286812	9.79649	5.72525e-05	up
MYH7B	1.85522	5.75439e-05	up
ENSG00000289726	7.35788	5.76976e-05	up
LINC01979	4.19829	5.80096e-05	up
ENSG00000279748	2.32605	5.86402e-05	up
CEMIP	-1.76246	5.88375e-05	down
CCNP	3.89267	5.89721e-05	up
SNX16	1.25975	5.94256e-05	up
AP4B1-AS1	-2.57939	5.9635e-05	down
ENSG00000274272	1.62349	5.99642e-05	up
ENSG00000287680	10.8676	6.05232e-05	up
ENSG00000278635	-2.14522	6.11731e-05	down
ENSG00000265474	-2.07994	6.11761e-05	down
ENSG00000288610	12.0128	6.16025e-05	up
ZFP3	3.45859	6.16406e-05	up
PAQR6	1.77407	6.20506e-05	up
ENSG00000280035	2.32786	6.38143e-05	up
IQCN	1.89628	6.43389e-05	up
H2BC3	12.6135	6.54441e-05	up
ENSG00000233589	-4.4432	6.56417e-05	down
CYP4F11	-3.20346	6.58322e-05	down
MT-TD	-1.40759	6.61594e-05	down
HEXIM2	1.00919	6.71608e-05	up
BMS1P8	1.03246	6.82375e-05	up
RAB3A	1.47049	6.93423e-05	up
AMPD1	9.9152	6.98969e-05	up
LINC01226	3.38684	7.24143e-05	up
SEMA4D	1.13972	7.29081e-05	up
KRTAP10-4	10.8506	7.3472e-05	up
SLC26A4	4.85354	7.46131e-05	up
TP53AIP1	9.77541	7.50722e-05	up
CCDC200	3.70495	7.51439e-05	up
NCKAP1L	8.20433	7.51964e-05	up
TSPEAR	1.45458	7.5359e-05	up
RIMKLBP2	-1.68928	7.69585e-05	down
ENSG00000286018	-4.91393	7.80013e-05	down
ZNF433	1.54571	8.09043e-05	up
DLEC1	2.20702	8.14481e-05	up
APC2	1.30201	8.20365e-05	up
ENSG00000277701	1.27699	8.28136e-05	up
ENSG00000257322	9.8195	8.41629e-05	up
FEZF1	9.99529	8.4249e-05	up
ENSG00000233029	9.66616	8.50504e-05	up
RGR	9.28062	8.64832e-05	up
ENSG00000237588	9.46222	8.77523e-05	up
TFPI2	-1.66608	8.79415e-05	down
ARL9	10.3581	8.85155e-05	up
ATP6V1FNB	2.02177	8.92313e-05	up
KCNS1	3.02502	8.98587e-05	up
HCG9	12.051	9.02667e-05	up
CDR2-DT	4.49709	9.27391e-05	up
ENSG00000253227	-1.79096	9.34753e-05	down
HCK	9.84307	9.3807e-05	up
ENSG00000233388	10.678	9.51635e-05	up
ENSG00000289637	4.572	9.68026e-05	up
NAIPP4	1.06478	9.72947e-05	up
ENSG00000254458	12.4084	9.83814e-05	up
PDX1	1.18553	9.94722e-05	up
RNF225	3.92251	9.96685e-05	up
ENSG00000265194	-3.65287	9.9887e-05	down
TAF7L	3.04753	9.99252e-05	up
ENSG00000279859	3.23557	9.99134e-05	up
ENSG00000271862	-2.04234	0.000100158	down
TRIM58	-9.00508	0.0001007	down
H1-3	5.35815	0.000101241	up
KIF27	1.06768	0.000101591	up
CFAP43	2.15063	0.000101554	up
PADI1	-9.00749	0.000102299	down
CCT6P3	1.03565	0.000103795	up
ENSG00000289513	3.21642	0.000104436	up
MARCHF1	-1.58805	0.000104627	down
IFIT3	-1.18166	0.000104576	down
ENSG00000290043	11.326	0.000104585	up
H2AC15	2.57237	0.000104675	up
ENSG00000272849	1.42769	0.000106288	up
ANKS1B	1.2541	0.000109751	up
TAGAP	9.40475	0.000110959	up
SLC4A1	9.12612	0.000111082	up
PDE4DIPP1	10.8363	0.000112286	up
FLT4	8.32704	0.000112563	up
MARK2P9	2.159	0.000112635	up
GPR84	10.4345	0.000113435	up
NPIPB6	2.17636	0.000115174	up
CDRT15P14	4.71061	0.00011639	up
CYMP-AS1	10.2801	0.000119368	up
LINC02596	11.8436	0.000119775	up
TMEM86A	2.66354	0.000119869	up
NCF2	-1.6446	0.000121752	down
NPFFR1	8.2644	0.000121757	up
ENSG00000270210	11.8021	0.000123798	up
ENSG00000267257	-10.0547	0.000124217	down
TEX54	12.5299	0.000127235	up
H3C13	2.97664	0.000127791	up
OR7D2	9.61349	0.000127898	up
ENSG00000283544	-11.5146	0.000129498	down
TRIM74	2.41047	0.000131183	up
KLLN	1.71895	0.000131284	up
ENSG00000259002	10.9822	0.000131689	up
AKR1B10	-1.2854	0.000131927	down
SNORD101	-3.38772	0.000132581	down
ENSG00000258811	3.98499	0.000133121	up
PPM1J-DT	10.3015	0.00013358	up
SLC6A5	8.61584	0.000134793	up
CHORDC1P4	1.45165	0.00013503	up
ULBP1	1.21491	0.0001357	up
ENSG00000289626	1.9617	0.000136703	up
PHB1P9	-2.87994	0.000138589	down
PAX2	4.6546	0.000139244	up
ENSG00000230248	12.1375	0.00013983	up
LINC00426	8.8729	0.000139915	up
GALNT3	1.29798	0.000140065	up
NPAP1P3	10.7664	0.000140593	up
ENSG00000288996	3.34028	0.000141075	up
ANKRD10-IT1	-1.54842	0.000141961	down
POLG-DT	2.64068	0.000142505	up
H1-10-AS1	2.41048	0.00014328	up
OR2B6	3.76825	0.000144653	up
PHB1P12	3.98601	0.000144744	up
TNFSF14	6.01572	0.000145777	up
ENSG00000279347	-2.49801	0.000145998	down
ENSG00000240729	12.4796	0.000148811	up
ENSG00000287516	7.97166	0.000150028	up
KCNA1	8.44188	0.000150985	up
ENSG00000270228	-10.2196	0.000151375	down
MYOZ3	1.95406	0.000153385	up
MUC1	1.95081	0.000155451	up
BCAR4	4.79893	0.00015558	up
IDI2	5.24467	0.000155892	up
LINC01361	2.46657	0.000159066	up
ENSG00000266677	10.144	0.000160862	up
ENSG00000286938	4.59275	0.00016174	up
ENSG00000272442	-9.47324	0.000162137	down
ENSG00000270871	-2.22544	0.000164597	down
ENSG00000235296	4.2712	0.000165287	up
TINCR	1.67825	0.000168229	up
ENSG00000289063	11.545	0.000172886	up
ENSG00000286267	2.89138	0.000173273	up
LCT	8.69139	0.000173722	up
LILRA6	4.06826	0.000173919	up
EOMES	1.20478	0.000174008	up
ENSG00000280332	-2.30673	0.000174499	down
NLRP5	9.45392	0.00017666	up
NBPF7P	11.0761	0.000177634	up
SKOR1	2.9113	0.000182456	up
CALHM4	9.2728	0.000185016	up
LGALS9	2.25902	0.00018532	up
IL13	4.0243	0.000185292	up
SLC27A5	1.27759	0.000186131	up
PYY	11.1124	0.000190545	up
ENSG00000286155	2.81342	0.000190842	up
ENSG00000261094	1.7581	0.000193746	up
TPTEP2-CSNK1E	3.77738	0.000196444	up
FCGR1BP	8.67868	0.000200193	up
ENSG00000267629	1.11232	0.00020157	up
ENSG00000230615	2.65973	0.000203564	up
ENSG00000232811	1.43701	0.000208054	up
ENSG00000289434	11.9824	0.000207976	up
ENSG00000272008	1.74116	0.000208723	up
ZNF132-DT	1.68362	0.000210109	up
CHRM4	1.92175	0.000214356	up
ENSG00000286001	3.41006	0.000216702	up
CASS4	5.38329	0.000217666	up
ENSG00000286223	-10.9453	0.000218983	down
CCDC184	5.36191	0.000219009	up
ENSG00000287454	3.771	0.000219762	up
ENSG00000243230	-3.12328	0.000219949	down
ENSG00000288928	-2.08255	0.000222611	down
B3GNT4	1.88952	0.000223395	up
ENSG00000287684	9.36377	0.000226686	up
BHLHE41	1.24341	0.000226873	up
GFRA3	10.3845	0.000227417	up
CFAP97D1	3.14691	0.000229748	up
PSMB11	10.4941	0.000231736	up
LINC01595	11.4429	0.000234291	up
ENSG00000277595	5.20467	0.000236084	up
C9orf152	3.12299	0.000237378	up
ENSG00000286360	-3.38354	0.000237599	down
ENSG00000268107	-10.1861	0.000237816	down
DUSP15	2.258	0.000237938	up
ENSG00000287766	10.8329	0.000241171	up
ELAVL3	3.18933	0.000241497	up
ENSG00000285952	10.1312	0.000242142	up
KLHL33	3.98263	0.000242373	up
C5AR2	8.53172	0.000245463	up
ALG14-AS1	11.1909	0.000246075	up
ENSG00000223390	11.6778	0.000246166	up
ENSG00000267197	-5.44121	0.000246533	down
ENSG00000213318	11.7158	0.000252585	up
EFCC1	9.66157	0.000252811	up
BOC	4.69067	0.000252975	up
ENSG00000287032	10.0135	0.000253829	up
NAIPP2	1.00266	0.000254562	up
ATP1A4	5.02684	0.000255285	up
ENSG00000285886	4.29375	0.000255633	up
PGA4	3.99619	0.000256838	up
PAPOLB	9.21979	0.000257156	up
FLRT2-AS1	-1.17714	0.000261067	down
KRTAP10-3	5.95228	0.000261482	up
OR10H2	11.28	0.000263243	up
ENSG00000262370	4.57054	0.000263805	up
SAG	7.65802	0.000264694	up
TBX21	9.88667	0.000264863	up
ABCC8	6.46692	0.000268254	up
ENSG00000282381	1.04999	0.000269831	up
FLT3	9.28653	0.000271312	up
SLC9A3R1-AS1	12.11	0.000281553	up
ATP4A	9.38936	0.000281836	up
ITGA2B	3.65489	0.00028393	up
CRACDL	1.18449	0.000285027	up
ELOA3CP	5.2929	0.000287067	up
SLC8A3	8.13873	0.000287121	up
APCDD1L-DT	-3.65317	0.000287954	down
GAPDHP37	11.5152	0.000290867	up
ENSG00000205959	1.7574	0.000293351	up
ENSG00000268496	3.6089	0.000297234	up
KCNJ4	2.38707	0.000297436	up
CLDN9	1.93656	0.000297677	up
ALPP	3.51509	0.000301117	up
KMT2E-AS1	1.07952	0.000305047	up
HEATR4	2.0741	0.000304993	up
AOX2P	9.31637	0.000305052	up
EBLN2	-2.59155	0.000305184	down
LINC02610	9.08262	0.000307481	up
BST2	-2.0264	0.000308193	down
ENSG00000274944	9.56643	0.000308238	up
CD4	2.1354	0.00030899	up
ENSG00000286149	2.6977	0.000309585	up
LCN10	2.78945	0.000311145	up
GJC2	2.90948	0.000311284	up
HBA2	7.52004	0.000311527	up
ELOA3BP	5.51634	0.000313502	up
ELOA3P	5.9048	0.000314517	up
ENSG00000260750	9.29608	0.000316542	up
ENSG00000241962	1.67472	0.000321621	up
H1-4	2.27003	0.000322883	up
C10orf99	11.4892	0.000325862	up
ADSS1	1.65224	0.000327259	up
CDKL2	4.23945	0.000327368	up
PRPF31-AS1	1.62075	0.000330802	up
ENSG00000275778	1.04015	0.000331656	up
CACNA1F	8.3843	0.000332111	up
TCAM1P	9.4066	0.000336363	up
CASQ1	10.1321	0.00033668	up
LINC01881	1.03273	0.000336894	up
ENSG00000266830	10.5768	0.000340134	up
RPL3P7	3.95365	0.000340959	up
ENSG00000167774	-2.78567	0.000343553	down
ENSG00000257176	1.10427	0.000343578	up
ENSG00000223356	2.83568	0.000345579	up
CLMP	-1.76891	0.00034797	down
MAK	1.86127	0.000347988	up
HBA1	7.73798	0.00035023	up
ENSG00000227407	2.52166	0.000358863	up
ENSG00000268655	10.817	0.000362509	up
RAET1E	3.13935	0.000363679	up
PDXP-DT	3.1187	0.00036929	up
MVP-DT	-1.46578	0.000373341	down
LINC00624	-2.63582	0.0003746	down
SOCS1	2.24063	0.000376018	up
ENSG00000268119	3.68791	0.000376745	up
PPP1R13B-DT	3.25842	0.000377288	up
RSPH6A	9.88674	0.000377226	up
LINC01907	3.22877	0.000377645	up
ENSG00000286322	10.5823	0.000377643	up
SP7	9.40365	0.000377801	up
GUSBP9	1.03248	0.000384668	up
ENSG00000255847	4.30883	0.000384526	up
IGBP1-AS1	-11.8898	0.0003874	down
HOTTIP	2.13768	0.000387707	up
ENSG00000213386	11.6619	0.000390935	up
ENSG00000231628	-4.23758	0.000392184	down
ALPG	9.88657	0.000394674	up
SNORA73B	-3.54132	0.000399857	down
ENSG00000263276	-2.02838	0.000408136	down
PHACTR2P1	4.98285	0.000408582	up
ENSG00000280418	4.55343	0.000409274	up
ENSG00000288531	4.18511	0.000413344	up
FGFBP2	10.9685	0.00041318	up
KRT42P	8.99428	0.000413912	up
ENSG00000261468	-1.53417	0.000415249	down
RN7SL481P	-12.8131	0.000426727	down
NLRP9	9.30832	0.000430285	up
ELOA2	4.57139	0.000432881	up
LINC02356	12.5383	0.000434403	up
UBTFL6	11.1832	0.000439767	up
HKDC1	-1.524	0.000444194	down
GLI1	1.25133	0.000444773	up
FAM209A	4.15404	0.000448968	up
SASH3	9.71539	0.00044904	up
ARL10	1.59156	0.00044987	up
HMMR-AS1	11.289	0.000452687	up
ENSG00000243620	1.18747	0.000453198	up
ELOCP19	-3.13505	0.000470775	down
ENSG00000273306	-1.15456	0.000473553	down
GTF2IP14	3.75014	0.00047371	up
FAM177B	9.58144	0.000475229	up
ENSG00000256196	1.51133	0.000477754	up
LRRC43	9.71007	0.000481846	up
ENSG00000265496	-11.7797	0.000482272	down
LY6E	-1.01137	0.00048359	down
NACAD	2.22428	0.000484092	up
CARMIL3	1.84723	0.000486744	up
ANKRD34A	2.39362	0.000489064	up
ZNF502	4.51655	0.000503463	up
SLC10A1	3.53547	0.000505723	up
SPACA6-AS1	2.5991	0.000509299	up
FLJ42969	9.4363	0.00051625	up
ENSG00000236255	1.52429	0.00052375	up
FOXD4	2.24315	0.000529017	up
ENSG00000234080	11.3131	0.000533288	up
CAPN11	9.36317	0.000535954	up
SLC10A6	10.5064	0.000539185	up
SPDYE16	2.50859	0.000552997	up
ZNF674	1.10222	0.000555957	up
PPP1R32	1.62566	0.000562993	up
HNRNPA1P49	-1.74167	0.000571625	down
INSRR	8.78509	0.000573709	up
RPLP0P2	8.9985	0.000574742	up
ENSG00000280266	10.4887	0.000578026	up
ENSG00000288065	-2.35911	0.000579974	down
ENSG00000289138	-1.07615	0.000580067	down
FGF21	10.6899	0.0005822	up
HRH4	9.26347	0.000587278	up
SENP3-EIF4A1	2.9154	0.000592169	up
RXFP4	2.95771	0.000594558	up
ENSG00000225313	-1.57543	0.000599443	down
FLRT1	2.16404	0.000606656	up
ITGAM	2.97202	0.000606728	up
JMJD7	1.64967	0.00061658	up
TBC1D3P1	10.2936	0.000621283	up
C2CD4A	-1.30987	0.000622482	down
LINC02097	8.80733	0.000626977	up
ENSG00000289303	3.92515	0.000633356	up
AZIN2	2.19564	0.000634748	up
SCN1A	3.00325	0.000641126	up
NFE2L1-DT	2.04841	0.000641753	up
IPCEF1	2.76656	0.000643075	up
FTH1P1	2.50932	0.000645375	up
LINC00635	4.78302	0.000645492	up
ENSG00000289589	3.12602	0.000649492	up
FYB1	4.80716	0.000659451	up
ENSG00000256029	8.03484	0.000660262	up
MREG	1.13103	0.000666408	up
H4-16	1.07197	0.000668941	up
SLC11A1	7.92504	0.000672425	up
RARA-AS1	2.1561	0.000676514	up
RPL30-AS1	-1.93228	0.000683494	down
LDHC	10.1179	0.000685868	up
CASKIN1	1.33352	0.00068838	up
MROH7	4.21387	0.000692421	up
PRSS36	9.10629	0.000693555	up
ASIC4	2.85883	0.000695835	up
SPDYE18	1.93691	0.000697057	up
KCND1	1.18117	0.000699491	up
LXN	-10.3401	0.000704573	down
ENSG00000250746	-1.61946	0.00071037	down
ENSG00000234537	10.1937	0.000712751	up
SNORA71B	-2.6364	0.000735458	down
HBB	9.50222	0.000737282	up
ENSG00000289886	4.10531	0.000738438	up
MIR4280HG	4.60649	0.000740361	up
ENSG00000287879	9.7215	0.000745423	up
TTC9B	9.90229	0.00074749	up
RASL11B	4.35129	0.000749494	up
SIRT4	1.63218	0.000751646	up
NUP210L	2.6141	0.000760599	up
GK-AS1	-11.5895	0.000767771	down
ATF4P1	4.07486	0.000769935	up
ERN2	5.14977	0.000772105	up
SREBF2-AS1	2.57647	0.00077956	up
LINC02969	1.04447	0.000780273	up
ENSG00000287737	1.35543	0.000781663	up
ENSG00000263126	-1.99223	0.000783305	down
KCNK4	9.49451	0.000789356	up
ENSG00000236194	2.47728	0.000790441	up
ENSG00000289117	3.75818	0.000790363	up
PARP15	1.55315	0.000790989	up
SLC6A17	3.59564	0.000793227	up
ENSG00000274895	1.87111	0.000796121	up
PERM1	9.24558	0.000805465	up
MRPS15P1	2.77529	0.000807988	up
RASA4B	1.07079	0.000812165	up
SNORA22	-13.7325	0.000823965	down
NIM1K	2.26362	0.000828403	up
CFAP46	7.60798	0.000837767	up
DGKE	1.05913	0.000841136	up
ATP5F1AP3	5.02447	0.000840985	up
TRIM75	10.1657	0.000852454	up
SLC22A2	8.4153	0.000854239	up
MFSD2B	2.79492	0.000858276	up
C17orf99	9.50182	0.000864153	up
ENSG00000257489	1.0029	0.000868106	up
HNRNPK-AS1	-2.6542	0.00086906	down
ERICH5	4.16612	0.000870825	up
RUNX3	1.13425	0.000871363	up
MYBPHL	10.2261	0.000871294	up
ENSG00000288007	2.8827	0.000878673	up
ENSG00000240338	10.4313	0.000882129	up
CHRNB2	1.89379	0.000883922	up
ENSG00000273342	12.1794	0.000887742	up
ENSG00000253194	-2.16462	0.000888588	down
LSMEM1	1.65406	0.000892452	up
NTSR2	10.2871	0.000894701	up
PPP1R1B	8.8117	0.000899257	up
CNR1	4.21071	0.000903073	up
RSPH9	1.64315	0.000905024	up
C9	8.89386	0.000918434	up
ENSG00000287185	9.2029	0.000925671	up
ENSG00000289975	2.03785	0.000926563	up
NPR3	3.34262	0.000928402	up
CHRNA6	9.61668	0.00092885	up
IGHA2	12.7424	0.000931474	up
DCAF8-DT	-1.47631	0.000933355	down
ENSG00000266651	-4.38627	0.00093856	down
ENSG00000234424	10.3491	0.00094562	up
MEI1	2.95003	0.00094959	up
ENSG00000287629	3.97781	0.000954165	up
LINC00899	8.68493	0.000954298	up
EPGN	9.25114	0.000954089	up
ENSG00000280063	-1.15838	0.000966578	down
ENSG00000253336	9.87441	0.000967816	up
PARVG	7.92194	0.000970031	up
PAUPAR	7.79313	0.000974731	up
XKR7	2.88701	0.000981417	up
MC2R	9.06771	0.000988095	up
ENSG00000255197	3.79665	0.000989739	up
ENSG00000214546	11.0267	0.000991954	up
CCDC62	8.91472	0.000998156	up
KLRG1	1.70643	0.00100054	up
CARMIL2	1.29127	0.00100422	up
LINC02560	5.06173	0.0010061	up
ENSG00000261613	1.36316	0.00101996	up
DKK4	11.178	0.00103141	up
HCAR3	-1.15923	0.00104182	down
IL12A-AS1	2.68701	0.00104283	up
CYP26A1	3.61656	0.00104313	up
ENSG00000283515	9.13747	0.00104354	up
LINC01511	9.2001	0.00104851	up
LINC01970	2.1237	0.00105141	up
RSPH10B	2.04838	0.00105269	up
ENSG00000286795	4.25924	0.00105637	up
DAZL	9.11773	0.00105683	up
ENSG00000289231	10.3142	0.00106228	up
IGHA1	14.6275	0.0010618	up
TUBA3GP	10.5066	0.00106407	up
MARK2P8	3.86145	0.00106594	up
LURAP1	10.0795	0.0010659	up
PTPN23-DT	1.17571	0.00106923	up
ENSG00000285873	-11.0812	0.00107293	down
OR11I1P	11.0018	0.00109131	up
ATF4P2	4.02586	0.00109672	up
SYN1	4.04914	0.00110461	up
ENSG00000270299	-4.60775	0.00110682	down
LINC02552	6.88292	0.00111674	up
ENSG00000234500	11.4303	0.00112136	up
LINC01133	9.11434	0.00112454	up
TTC16	8.3167	0.00113498	up
ENSG00000273576	1.65079	0.00114299	up
RASD2	5.06208	0.00114476	up
IL17REL	4.75288	0.00115188	up
CASTOR1	3.06474	0.00115481	up
CFAP251	1.36831	0.00115881	up
UCN2	10.403	0.00116026	up
LST1	9.66669	0.00116535	up
NUP93-DT	9.89884	0.00117107	up
ENSG00000239392	10.4684	0.00117664	up
ENSG00000228259	11.0256	0.00117896	up
ENSG00000233191	10.1404	0.00118029	up
ENSG00000251545	10.7909	0.00120637	up
DZIP1	1.11404	0.00121503	up
BARX1-DT	10.1147	0.00123132	up
UBE2V2P3	-11.9331	0.00124222	down
ENSG00000264735	4.40675	0.0012421	up
ENSG00000237846	1.96931	0.0012583	up
LRTOMT	1.75083	0.00128692	up
ENSG00000260261	1.24092	0.00129162	up
OR6J1	8.79098	0.00130237	up
ENSG00000271746	11.1565	0.00130524	up
ENSG00000260919	3.46616	0.00132471	up
KBTBD13	4.05892	0.00132974	up
ENSG00000276556	12.5927	0.00134168	up
ENSG00000285517	-1.81073	0.0013476	down
C1QC	10.0885	0.00135024	up
ADCY4	2.71446	0.00136584	up
RUNX2	1.08323	0.0013686	up
ISLR	-11.3103	0.00137905	down
TEX14	1.71412	0.00138866	up
ENSG00000287440	10.3922	0.00139102	up
DAAM2-AS1	5.50162	0.00139229	up
ENSG00000283390	1.12052	0.00139758	up
ENSG00000215795	2.50931	0.00140169	up
ENSG00000236456	4.04818	0.00141424	up
ID1	-1.69414	0.00142888	down
CYP2G1P	2.85069	0.00143154	up
C15orf48	-1.45737	0.00146399	down
GUSBP13	1.11579	0.00147182	up
CARMN	2.89833	0.00148252	up
ENSG00000270589	-2.67311	0.00149426	down
ELMO3	-1.36968	0.00150044	down
DOC2GP	1.77141	0.00150994	up
NUDT17	1.18607	0.00151484	up
ENSG00000279693	3.46893	0.00151549	up
LINC02934	2.15042	0.00151993	up
BTN2A3P	1.08899	0.00153098	up
ENSG00000280302	9.18796	0.00154161	up
CXCR1	9.58049	0.00154127	up
MKRN8P	10.4718	0.00155675	up
ENSG00000279382	-1.19426	0.00156492	down
LRFN1	1.21351	0.0015658	up
ENSG00000213981	9.73093	0.00156567	up
KL	8.60993	0.00159361	up
ENSG00000286302	-10.2581	0.00159925	down
FGD2	7.44614	0.0016019	up
OR10H5	8.08965	0.00162368	up
CATSPERD	9.37383	0.00163756	up
HIGD2B	10.7158	0.00163756	up
LINC02611	2.8133	0.00164192	up
SNORD104	-1.77172	0.00165541	down
ENSG00000273891	-3.36611	0.00166794	down
ENSG00000275582	-2.95454	0.00166924	down
SLC4A10	7.88259	0.00166951	up
LINC02275	8.23454	0.00169031	up
ENSG00000286379	2.50506	0.00171512	up
ZNF692-DT	11.9929	0.00171803	up
NECAB2	1.95836	0.00172076	up
SCML4	7.57366	0.00174227	up
CD300LB	9.40624	0.00175665	up
ENSG00000279526	10.2141	0.00175665	up
SLC22A8	7.79349	0.00176045	up
GUSBP16	1.11574	0.00176957	up
CAPN10-DT	1.07856	0.00177205	up
LINC02910	3.95719	0.00177211	up
ERICH4	10.8542	0.00177449	up
EVC2	1.22836	0.00179293	up
ENSG00000285530	8.91256	0.00179498	up
ENSG00000275120	2.11511	0.00179992	up
SNORD83A	-3.008	0.00181483	down
BGLAP	3.66037	0.00181857	up
TTC21A	1.18496	0.00182733	up
ABCA4	1.82056	0.00183013	up
KRTAP10-2	10.6509	0.00183826	up
GRID2IP	2.27059	0.00184383	up
RDH12	3.89038	0.00184876	up
ENSG00000256108	5.19222	0.00185682	up
ENSG00000237027	10.5432	0.00185737	up
CEBPB-AS1	2.08015	0.0018582	up
ARSH	9.46812	0.00186315	up
ENSG00000280067	-2.31123	0.00187124	down
PCDHGC5	2.5387	0.00187498	up
APRG1	-1.24971	0.00188224	down
ENSG00000285703	11.6994	0.00189596	up
ENSG00000274080	1.2449	0.00192079	up
ACADL	8.45397	0.00192264	up
ENSG00000273828	1.34503	0.00192788	up
SBNO1-AS1	1.69084	0.00193214	up
SLC5A5	2.70527	0.00194569	up
ST8SIA5-DT	1.95428	0.001953	up
ZACN	1.69507	0.00196236	up
ZSCAN12P1	1.22992	0.00197149	up
MEDAG	-2.40933	0.00199622	down
ALOX5AP	10.0458	0.00200349	up
ECEL1P2	9.97189	0.00202627	up
ENSG00000263033	10.6755	0.00202718	up
ANKAR	1.37286	0.00202976	up
SYNDIG1L	9.40137	0.00203914	up
LINC00671	5.23921	0.00204136	up
FPR2	8.93746	0.00205722	up
PCP4L1	10.3458	0.00206673	up
MROH5	8.55276	0.00207169	up
ENSG00000275645	12.047	0.00207292	up
OSCAR	9.75722	0.00207753	up
ENSG00000286747	1.70631	0.00208903	up
ENSG00000279861	-1.4832	0.00208995	down
ANO3	1.08908	0.0020947	up
ENSG00000288899	1.57344	0.00209497	up
ENSG00000281974	10.5508	0.00209362	up
ENSG00000289727	1.84256	0.00210065	up
ENSG00000274021	-1.32212	0.00210372	down
CILP	3.07127	0.00210519	up
PEX5L	1.77325	0.00211311	up
PCDHGB6	-1.06251	0.00212642	down
ZNF385B	1.01828	0.00214135	up
SRL	3.92585	0.00214361	up
CCDC194	8.57085	0.00216514	up
TTLL8	9.4123	0.00216514	up
DNAH10	1.96398	0.00216921	up
ENSG00000278986	-2.74565	0.00218963	down
STX1B	1.6256	0.00220211	up
LINC01363	9.99035	0.00220323	up
ENSG00000279500	-3.21787	0.00220539	down
VPREB3	11.6145	0.00220733	up
ENSG00000228463	1.04143	0.00221453	up
ENSG00000274270	2.35599	0.00223345	up
YAP1P1	3.95338	0.0022529	up
ENSG00000286665	10.7862	0.00225537	up
IER5L-AS1	8.1955	0.00225611	up
LINC02956	9.45277	0.0022719	up
IL3RA	3.09889	0.00227706	up
ENSG00000264057	10.8864	0.00227674	up
PDK4-AS1	3.94766	0.00227853	up
ZBTB8B	3.77757	0.00228387	up
ENSG00000233708	9.80782	0.0023182	up
PPIL6	1.82769	0.00233356	up
ZNF774	1.06239	0.00233662	up
MFAP1P1	4.26112	0.0023398	up
ENSG00000228352	-11.2748	0.00234688	down
FLJ40194	7.8825	0.00235737	up
ENSG00000265298	1.56641	0.00235853	up
SLIT1	1.61561	0.00235924	up
QKILA	9.87572	0.00236466	up
ENSG00000265798	4.20959	0.00237226	up
ENSG00000225931	10.4262	0.00237416	up
CPSF4L	-9.93879	0.002377	down
GNRH1	-2.02964	0.0024	down
VSX2	4.02409	0.00240133	up
H2BC8	1.36192	0.00241935	up
ENSG00000286032	2.0764	0.00241931	up
LY6G6E	3.80542	0.00243042	up
ENSG00000287895	10.6037	0.00244146	up
ENSG00000279196	1.30515	0.00244943	up
H3C7	3.24106	0.00247338	up
ENSG00000230953	-2.00882	0.00247664	down
HSD11B1L	1.56621	0.00248694	up
DDX25	3.37854	0.00248908	up
ENSG00000272167	-2.11013	0.00249327	down
FBXO16	3.75891	0.00249337	up
TUBA8	1.71352	0.0024975	up
MMP19	1.88645	0.00249887	up
LINC02918	1.65875	0.0025013	up
ENSG00000289560	2.22555	0.00250113	up
ENSG00000285928	2.75707	0.00250272	up
SBF1P2	9.38298	0.0025084	up
ENSG00000270773	11.1524	0.00252658	up
CCR2	2.31506	0.00253241	up
ENSG00000227230	-11.072	0.00254019	down
CD6	8.13703	0.00255862	up
TBX10	2.58061	0.0025615	up
AATK	1.11705	0.00257764	up
CYP3A4	3.48157	0.0025794	up
ENSG00000282964	11.6009	0.00258434	up
ENSG00000277283	-1.53066	0.00259153	down
ENSG00000288612	1.46921	0.00261337	up
KDSR-DT	11.0297	0.00263086	up
KCNN1	8.71401	0.00263515	up
TLX2	3.91336	0.00265345	up
ENSG00000253389	10.2563	0.00265352	up
ALDOAP1	10.6617	0.00265352	up
INHBC	1.35168	0.00265706	up
DLG4	1.00568	0.00265939	up
PTGDR2	1.08316	0.00265971	up
HACD4	-2.68266	0.00268761	down
ENSG00000265254	2.98482	0.0027084	up
KCNE4	1.37849	0.00271187	up
CALHM3	10.0592	0.00272778	up
RSPH10B2	1.58609	0.0027436	up
C2CD6	7.953	0.00274957	up
ATG9B	1.54116	0.00275784	up
SERPINA2	10.8358	0.00275822	up
ENSG00000285771	10.4695	0.00276037	up
TMC8	1.49519	0.00276661	up
LINC00629	9.18367	0.00276969	up
LBX2	1.36713	0.00278705	up
WNT8B	9.60032	0.00278665	up
GCSIR	8.60796	0.00278874	up
PDGFA-DT	2.6771	0.00279331	up
GPR62	4.75951	0.00279935	up
ENSG00000288562	9.85648	0.00281606	up
FBLL1	2.43041	0.00282193	up
OAS1	-1.33551	0.0028268	down
PRLHR	8.17268	0.0028299	up
ENSG00000250654	10.1786	0.00283214	up
ENSG00000266932	10.8888	0.00286554	up
UBQLN1-AS1	1.10287	0.00287744	up
ENSG00000259314	11.0147	0.00289589	up
ENSG00000287957	-2.00887	0.00289968	down
FAM187B2P	3.53639	0.00290284	up
TCP10L2	3.20823	0.00290932	up
ABT1P1	10.9668	0.00292162	up
SMIM24	3.14868	0.00292555	up
ENSG00000226332	-1.503	0.00294177	down
ENSG00000268087	-1.15191	0.00294223	down
ADAMTSL3	-7.16698	0.00295631	down
LINC01345	4.54793	0.00295744	up
BRD9P1	11.5211	0.00296197	up
DCXR-DT	2.37913	0.00296513	up
LINC01397	10.4211	0.00298138	up
MED28-DT	1.8519	0.00298326	up
RNF150	1.14806	0.00301407	up
LINC03016	3.29466	0.0030232	up
ENSG00000282024	4.20705	0.00302384	up
FAM90A1	9.35754	0.00302467	up
ENSG00000288979	-1.37547	0.00304723	down
SNHG19	-1.11008	0.00305424	down
ITGA9	2.37997	0.00305524	up
ENSG00000228238	8.22153	0.00307729	up
ENSG00000283095	10.1031	0.00308063	up
MR1	1.26058	0.00316983	up
FCGR3A	8.4057	0.00318199	up
ENSG00000286342	1.94663	0.00320585	up
RFPL3S	2.87089	0.00322462	up
ENSG00000235979	4.26109	0.00323382	up
DYNLT2	1.08611	0.00323771	up
ENSG00000260000	-1.35619	0.00330173	down
DNM1P35	1.60321	0.00330903	up
ENSG00000259304	-10.3911	0.00331223	down
TUBB8P11	10.5312	0.00333497	up
ENSG00000260082	11.4112	0.00333489	up
CALB1	-2.34701	0.0033378	down
ENSG00000279135	4.25794	0.00334115	up
OVOL3	11.0231	0.00335104	up
MYH7	8.03703	0.00335862	up
ENSG00000261253	3.72866	0.00338587	up
PTX4	9.87641	0.0033885	up
SOWAHD	3.4872	0.00341425	up
ENSG00000230835	11.9486	0.00341686	up
ENSG00000288063	3.61132	0.00343191	up
ENSG00000288956	10.466	0.00343158	up
OR2AT4	7.53934	0.00343511	up
TXNP6	12.3528	0.0034482	up
FHL5	8.57932	0.00347102	up
ENSG00000253181	10.3409	0.00347102	up
LINC02576	9.84924	0.00347727	up
OR2C1	10.1647	0.00349656	up
TMEM204	2.48372	0.00350111	up
ENSG00000226355	9.55351	0.00350231	up
PACSIN1	3.82436	0.00351332	up
CCDC152	-1.18299	0.00352766	down
ENSG00000289415	10.8251	0.00353292	up
NRBF2P3	2.47015	0.00353442	up
DUOXA1	3.69202	0.00354094	up
BPIFB1	9.00924	0.00354027	up
ENSG00000285736	3.77218	0.00354964	up
LINC01191	3.02145	0.00355869	up
PCDHGA9	-1.21109	0.00358417	down
LINC02809	2.75596	0.00358786	up
ANKRD26P3	8.46304	0.00359956	up
LINC01460	8.92969	0.00361611	up
KLRD1	6.41148	0.00363965	up
FLNB-AS1	-2.69926	0.00364696	down
CGB7	3.06019	0.00365859	up
ENSG00000285521	10.4129	0.00366107	up
ENSG00000226706	-2.70969	0.00367109	down
NPPB	-2.19745	0.00367821	down
ENSG00000286952	2.86648	0.00368277	up
GADL1	7.73627	0.00372942	up
SEPTIN12	9.49054	0.0037348	up
SMIM44	10.3915	0.00374135	up
ODF3B	2.07672	0.00374322	up
ATP6V1G2	2.20439	0.00374854	up
ENSG00000258344	-6.6478	0.00376252	down
ENSG00000272374	2.01666	0.00377115	up
TRMT61A-DT	1.05327	0.00377231	up
PVRIG	-9.90464	0.00377777	down
SLC25A47	10.1567	0.00378523	up
MGARP	2.56505	0.00379954	up
CHST5	5.17532	0.0038233	up
ADPGK-AS1	1.62058	0.0038361	up
DMRTA2	4.04637	0.00387788	up
DQX1	1.8033	0.00387912	up
ENSG00000232748	-1.12258	0.00388723	down
ENSG00000228010	3.07076	0.00388632	up
ENSG00000288960	10.2057	0.00389655	up
ENSG00000279089	-1.06558	0.00390081	down
HSPA5-DT	2.84867	0.00390047	up
ENSG00000179131	2.99604	0.00390284	up
CCL2	-2.18234	0.00392673	down
GPR162	1.75368	0.00392952	up
TCF23	8.30528	0.00393386	up
ENSG00000234389	10.2001	0.00395332	up
CACNA2D2	1.68944	0.0039664	up
TM4SF19	-3.0786	0.00397824	down
DRAIC	1.52406	0.00397823	up
ZAR1L	3.79924	0.00398802	up
NDUFV1-DT	2.90468	0.00399985	up
SLCO4A1	-1.15636	0.00400815	down
H2AC17	1.36138	0.00401673	up
KCNQ4	1.56931	0.00404005	up
ENSG00000254054	4.02012	0.00404851	up
IL5	4.52725	0.00405116	up
FNDC11	2.97031	0.00405779	up
MICU3	1.13078	0.0040822	up
RABGEF1P2	10.6848	0.00408308	up
HMGN1P1	-3.91441	0.00409162	down
MIR6859-3	-3.66613	0.0040932	down
C16orf89	9.57803	0.0040959	up
ENSG00000272574	-11.6132	0.0041013	down
ENSG00000273335	3.45945	0.0041201	up
WAPL-DT	-1.59942	0.00412285	down
ENSG00000203395	10.0651	0.00413987	up
GSC2	9.2211	0.00418353	up
CYMP	10.2191	0.00418353	up
PLIN1	1.07148	0.00418492	up
USP30-AS1	6.34088	0.00422166	up
HOMER3-AS1	9.86528	0.00424315	up
KLF1	9.94688	0.00424492	up
ENSG00000197670	-2.4511	0.00425731	down
YIPF7	8.21906	0.00425918	up
ENSG00000249379	-3.63232	0.00427024	down
CALY	3.94566	0.0042927	up
PPEF2	8.19827	0.00430101	up
ENSG00000272950	4.38059	0.00432789	up
ENSG00000234773	1.60048	0.0043442	up
ENSG00000284128	3.23552	0.00434491	up
ENSG00000233558	11.7207	0.00434371	up
ADAMTS16-DT	-1.7975	0.00437602	down
FGF11	1.30216	0.0044083	up
ENSG00000261003	3.43239	0.00441003	up
VCX3B	2.18594	0.00442863	up
GCOM1	1.37524	0.00443998	up
OSTM1-AS1	8.75151	0.00444176	up
ENSG00000267251	2.25183	0.00446638	up
LINC02864	-7.06941	0.00449622	down
ENSG00000278985	-3.01543	0.00449976	down
PRX	1.13387	0.0045113	up
ENSG00000253392	2.74435	0.00453038	up
ENSG00000266718	3.23918	0.0045366	up
ENSG00000233820	9.94976	0.00454672	up
ENSG00000264635	-1.96956	0.00459831	down
DFFBP1	-2.02202	0.00460866	down
CCDC30	1.86857	0.0046365	up
ENSG00000283580	2.44847	0.00465305	up
ENSG00000279541	1.75537	0.0046546	up
IFI27	-1.0906	0.00466222	down
LINC02728	-1.72618	0.00467003	down
ZNF709	1.24944	0.00468054	up
ENSG00000279648	9.57261	0.00467994	up
TPBGL-AS1	3.73031	0.00468215	up
COPZ2	2.25287	0.00469088	up
PBX4	2.58831	0.00470546	up
IHO1	3.89584	0.0047195	up
RPS2P44	10.7705	0.00473622	up
GOLGA6GP	9.17881	0.0047396	up
LPAL2	1.10204	0.00477383	up
ENSG00000279359	8.51271	0.004787	up
CPNE8-AS1	2.39338	0.00480718	up
RGS7	-5.83028	0.00483564	down
ENSG00000270257	-12.823	0.00485871	down
ENSG00000271989	5.46332	0.00487694	up
KLF2	1.28391	0.00488123	up
H2AZ1-DT	3.03778	0.00491093	up
ACTN3	1.38461	0.00492192	up
ENSG00000250920	-2.89562	0.00494147	down
ENSG00000255326	11.1554	0.0049523	up
ENSG00000286846	1.50557	0.00498058	up
ENSG00000233393	9.24614	0.00499846	up
ENSG00000267638	11.9668	0.00500263	up
ENSG00000228577	-11.5179	0.00503064	down
TRPC7	8.54761	0.00505357	up
TAX1BP1-AS1	3.38437	0.00511472	up
ENSG00000272945	-2.41629	0.00512302	down
PTH1R	9.0728	0.00512943	up
OVOL1	1.07412	0.00514427	up
CD160	1.46604	0.00514302	up
LINC00957	9.06726	0.00516337	up
FRMPD1	3.58586	0.005165	up
ENSG00000287529	10.5393	0.00519018	up
KRTAP5-1	3.49981	0.00519891	up
HRG	1.62339	0.00520857	up
LILRB5	7.59253	0.00522281	up
ENSG00000279048	1.84529	0.00525695	up
SPEM2	9.77986	0.00527488	up
C11orf86	3.70463	0.00528325	up
ESPNL	1.69562	0.00528861	up
FAM228B	1.88336	0.00533669	up
ERICH3	3.72712	0.00533822	up
RNASE13	3.72281	0.00534813	up
ENSG00000260777	1.2486	0.00536558	up
UBL4B	9.94944	0.00537064	up
ENSG00000261668	3.90958	0.00537918	up
IZUMO1	3.63533	0.00538514	up
ENSG00000270402	11.1561	0.00540245	up
PIWIL2	2.04821	0.00543351	up
C21orf62-AS1	1.49682	0.00544079	up
GRK6P1	9.88035	0.00544558	up
MUC2	6.86781	0.00544794	up
ENSG00000270184	-2.95314	0.00545951	down
ENSG00000275812	12.1852	0.00547267	up
ENSG00000261335	-1.57896	0.00549362	down
SNAI2	-1.51158	0.00549791	down
ENSG00000286046	10.5353	0.00550629	up
TLL2	1.67368	0.00556002	up
ENSG00000258529	-9.02969	0.00557961	down
ENSG00000231977	-9.87708	0.00558204	down
ENSG00000253961	-10.6933	0.00560223	down
ENSG00000270159	-11.6095	0.00561767	down
TERC	10.2507	0.00561686	up
P4HTM	1.64514	0.00562698	up
ENSG00000278878	-3.23389	0.0056477	down
DEPDC4	1.05585	0.00568111	up
MIA-RAB4B	2.78473	0.00568341	up
ODF3L1	3.23029	0.0056823	up
SPATA18	8.20707	0.00568284	up
SNORA33	-2.4066	0.00569725	down
ZNRD2-DT	1.2416	0.00570211	up
ENSG00000289463	-2.4077	0.00570911	down
ENSG00000280571	-1.20751	0.00571466	down
OR6E1P	10.6159	0.00571692	up
ADCY1	2.43495	0.00573044	up
SH3GL2	3.37019	0.00572904	up
UBE2L5	3.9369	0.00572692	up
ENSG00000284602	1.37791	0.00576943	up
PIGR	2.35586	0.00580804	up
LINC02150	9.79902	0.00580759	up
ENSG00000266680	1.56882	0.00585292	up
SCRT1	3.68238	0.00587841	up
ADAT3	1.02657	0.00588487	up
TLR7	-7.91467	0.00595314	down
MEIG1	4.98871	0.00600536	up
ENSG00000271976	-1.01416	0.00603249	down
ENSG00000261526	1.10703	0.00603516	up
PKP4-AS1	-1.64254	0.00604154	down
TXK	2.49266	0.00606558	up
ENSG00000269069	1.16193	0.00606943	up
LAIR1	7.46653	0.0060783	up
PCSK6-AS1	11.0838	0.0060783	up
PHKG1	1.22792	0.00612757	up
ENSG00000267011	2.67392	0.00618722	up
LINC02982	8.6244	0.00619584	up
HMGB1P39	10.7817	0.00621775	up
KRTAP10-1	10.1944	0.00622838	up
CTRB2	3.41826	0.00623928	up
MOGAT2	8.36228	0.00629611	up
SEPTIN7P9	3.1979	0.00631188	up
JPH3	1.01479	0.00633916	up
ENSG00000288966	3.51751	0.00636269	up
LINC00663	1.4729	0.00643465	up
SERHL	2.14607	0.00644086	up
SULT1C2P1	9.51298	0.00648243	up
ENSG00000290126	1.86207	0.00648519	up
LINC02960	1.96256	0.00650511	up
ANKRD31	1.4065	0.00650744	up
ENSG00000262668	9.57962	0.00651562	up
HLA-F	-2.70624	0.0065554	down
ERVH48-1	3.04836	0.00655687	up
ENSG00000250934	3.58088	0.0065927	up
ENSG00000271396	2.30947	0.00661415	up
ENSG00000228852	-3.15105	0.00664663	down
HES7	9.90618	0.0066503	up
OVAAL	9.3471	0.00665586	up
LINGO3	1.84071	0.00668016	up
LRRC70	1.50484	0.0066848	up
XDH	1.25693	0.00668727	up
ENSG00000215464	11.6377	0.00673741	up
ENSG00000259562	-2.07663	0.00677065	down
ENSG00000257985	3.37564	0.00677504	up
CCL3L1	9.9378	0.00678544	up
EIF5AP2	10.4289	0.00680676	up
SHISAL2A	9.45069	0.00682818	up
KCNJ10	2.12812	0.00684267	up
SCUBE2	2.04264	0.0068993	up
ENSG00000237927	2.34645	0.00692209	up
NKG7	3.16315	0.00693584	up
UVRAG-DT	4.60526	0.00693391	up
PMS2P13	2.04632	0.00696139	up
ENSG00000278467	-2.99524	0.00698398	down
ENSG00000284914	-10.074	0.00703031	down
NEXN-AS1	1.88167	0.0070553	up
MIR6859-4	-14.1075	0.00707766	down
SIGLEC16	2.83488	0.00709512	up
ENSG00000280132	9.58393	0.00710162	up
ENSG00000280007	1.00416	0.00716582	up
ENSG00000280042	2.09342	0.00717692	up
MIR193BHG	-1.37929	0.00719948	down
ENSG00000289222	1.95304	0.00720066	up
APP-DT	8.6988	0.00722083	up
ENSG00000254433	-9.89299	0.00722746	down
TMEM105	1.77807	0.00723577	up
MYPN	2.40125	0.00723519	up
ENSG00000286808	-1.65213	0.0072756	down
TRIM10	1.0019	0.00727695	up
UXT-AS1	1.67082	0.00729303	up
ENSG00000260685	3.07712	0.00732012	up
GJD2-DT	2.51578	0.00734474	up
AP3B2	1.83378	0.00735152	up
LINC00528	2.65822	0.00736916	up
NUDT16-DT	2.25331	0.00740103	up
SRGAP2D	1.0459	0.00741773	up
ITGB5-AS1	11.4423	0.00744333	up
LINC02167	-9.62789	0.00745817	down
LINC02102	8.61338	0.00747685	up
ENSG00000271653	10.1002	0.00747685	up
ENSG00000224149	-9.05886	0.00748114	down
ENSG00000287706	9.61409	0.00748182	up
SNORD100	-13.9405	0.00752042	down
RPS2P36	10.638	0.00759311	up
ZAN	7.64956	0.00762679	up
CLDN18	3.53796	0.00763109	up
PNMA6E	8.6042	0.00763397	up
LINC02541	9.03489	0.00763397	up
SIM1	1.15544	0.00768204	up
LCK	3.66618	0.00771327	up
ENSG00000287644	11.3263	0.00775163	up
VPS33B-DT	4.23862	0.00777629	up
ENSG00000282887	10.4425	0.00779116	up
ENSG00000229407	11.0829	0.00779088	up
DOCK3	1.42467	0.00779539	up
DRC1	3.74097	0.00783687	up
NPAP1P2	10.1271	0.00784068	up
COMTD1	1.07886	0.00785964	up
ARAP1-AS2	-9.46524	0.00786563	down
GPR55	8.33209	0.00787366	up
SGSM2-AS1	-2.60225	0.00790018	down
VAX2	1.06493	0.00790766	up
CCDC13-AS1	9.22034	0.00792775	up
ENSG00000270911	3.95634	0.00795905	up
MYO7B	3.339	0.00798114	up
ENSG00000265749	-2.84234	0.00798658	down
BCRP3	2.1585	0.00802113	up
ACTG1P15	4.25638	0.00802163	up
GJA8	9.95663	0.00801893	up
TMC4	1.06131	0.00803282	up
ENSG00000283355	-3.64843	0.00804652	down
TFF2	1.59062	0.00805316	up
ENSG00000276997	1.62029	0.00808344	up
GPR61	3.30798	0.00809286	up
IGSF22-AS1	10.5693	0.00811131	up
SLC7A11-AS1	-1.9783	0.00816978	down
ENSG00000259433	9.1776	0.00819467	up
C7orf61	3.80039	0.00824043	up
ENSG00000288564	9.64737	0.00828104	up
DNM1P51	1.87841	0.00828843	up
ENSG00000257225	3.39296	0.00830961	up
TREH	8.69964	0.00831169	up
AVIL	1.02397	0.00833675	up
ENSG00000237719	-1.4881	0.00840063	down
ENSG00000267260	9.17848	0.00840322	up
ENSG00000289443	-2.11662	0.00845878	down
C1orf162	1.32568	0.00847611	up
DHDH	3.16656	0.00858943	up
H1-1	3.61109	0.00858872	up
BDKRB1	-9.05974	0.00862503	down
ENSG00000262703	-2.25242	0.00863978	down
DNAAF1	1.90419	0.00865155	up
MIR6859-2	-3.18164	0.00866346	down
DOCK9-DT	10.6714	0.00867748	up
PRMT5-DT	-4.44887	0.00871318	down
HSPB6	1.62073	0.00880853	up
H1-6	10.969	0.00882345	up
LY6G5C	1.21127	0.00882876	up
GNG11	-1.19328	0.0088576	down
ENSG00000262766	-1.63687	0.00887168	down
FEV	9.6161	0.00889802	up
ENSG00000287191	2.52834	0.00891621	up
SDAD1P1	2.8154	0.00892023	up
ENSG00000286545	-1.65277	0.00898625	down
TMEM106A	1.96364	0.00901619	up
CX3CR1	4.84935	0.00909015	up
ENSG00000238260	2.7832	0.00911226	up
OR9G3P	10.407	0.00912975	up
SH2D5	1.49267	0.0091592	up
ENSG00000204666	2.60829	0.0091988	up
RPL23AP37	11.2066	0.00921379	up
ENSG00000254694	-11.6461	0.00924785	down
ENSG00000280157	9.18148	0.00927469	up
HS3ST5	1.21586	0.00929365	up
MUC5AC	3.02421	0.00931055	up
CAMP	10.7056	0.00932228	up
MEP1B	8.96245	0.00933437	up
TTYH1	2.40113	0.00936484	up
ENSG00000228037	10.9388	0.009439	up
ANAPC1P6	11.0204	0.00946195	up
TEDC2-AS1	4.45222	0.00959669	up
SPATA31D5P	8.06797	0.00960567	up
ENSG00000285904	8.28154	0.00962186	up
TVP23A	-3.37737	0.00963918	down
SSTR5	-3.46845	0.00972125	down
LINC02138	3.698	0.0097622	up
CPSF1P1	1.42921	0.00977025	up
ZBTB20	1.2454	0.00978677	up
HNRNPD-DT	3.12184	0.00979979	up
NCF1B	4.34598	0.00980124	up
BRINP2	-1.8597	0.0098049	down
KRTAP10-5	10.0479	0.00981701	up
ENSG00000289059	9.78495	0.00981922	up
LINC01887	10.5796	0.00985814	up
RNU2-11P	12.7735	0.00985814	up
PRKACB-DT	-1.48164	0.00994271	down
GOLGA2P11	-7.67736	0.00995346	down
SNORD14A	-13.5443	0.0099606	down
C13orf42	8.74999	0.00998732	up
SPEM3	8.52861	0.0100068	up
PPP1R2P4	2.01765	0.0100197	up
ZKSCAN8P2	9.85902	0.0100547	up
G0S2	-1.4251	0.0100854	down
ENSG00000269540	9.91355	0.0101092	up
RASGRP4	3.87598	0.0101156	up
ENSG00000260643	2.15655	0.0101547	up
ENSG00000253106	-1.20379	0.0101587	down
ENSG00000231702	12.9587	0.010163	up
WFDC3	8.96532	0.0101701	up
LINC02925	2.7637	0.0101738	up
EIF1AY	-8.51956	0.0102408	down
SOX30	8.52138	0.0102449	up
CALN1	7.45801	0.0102576	up
ENSG00000286123	10.8569	0.0102889	up
ENSG00000268520	-3.16083	0.0102992	down
RTL9	7.86409	0.0103664	up
ENSG00000272483	3.58946	0.0105244	up
STAR	2.26766	0.0105288	up
ENSG00000235672	4.78564	0.0105605	up
SRD5A3-AS1	7.86959	0.0105843	up
ENSG00000229848	10.3656	0.0105988	up
ENSG00000280434	-1.98914	0.0107075	down
ENSG00000232862	9.92369	0.0107121	up
WNK3	2.53677	0.0107312	up
ENSG00000276393	11.4004	0.0107485	up
RGS16	1.3039	0.0107614	up
KRT8P46	1.1295	0.0107927	up
GABARAPL3	9.4138	0.0108077	up
TSPOAP1	1.1061	0.0108399	up
KCNA7	2.67008	0.0108432	up
ENSG00000281938	4.0244	0.0108923	up
TNFRSF13C	1.24252	0.0109003	up
GPT	1.27555	0.0109795	up
TIGD3	1.3003	0.0109831	up
BTG1P1	11.3016	0.011004	up
ISL1-DT	3.09472	0.0110244	up
ENSG00000264668	9.31433	0.0110565	up
MTND2P20	-10.6594	0.0110792	down
SNX18P12	-1.02854	0.0111656	down
AKAP4	3.61159	0.0111812	up
ENSG00000262223	2.0631	0.011197	up
ENSG00000231128	9.15772	0.0112451	up
FOXL2	-8.61445	0.0112967	down
H2BC13	1.80435	0.0113333	up
ABCA17P	4.5146	0.0113331	up
DNAH10OS	1.06768	0.0113386	up
ENSG00000277558	3.82035	0.011352	up
ENSG00000227388	1.80145	0.0113963	up
KCNK9	3.34003	0.0114124	up
SKP1P1	-2.60716	0.0114236	down
GPR32	10.2924	0.0114265	up
MAS1	3.01338	0.0114656	up
NOL8P1	8.48602	0.0114752	up
ENSG00000258302	-2.84603	0.0115095	down
LINGO1-AS1	8.85256	0.0115201	up
ENSG00000271716	4.1407	0.0115265	up
ENSG00000272153	-1.65834	0.0115477	down
CKAP2P1	9.19686	0.0115641	up
ENSG00000254596	11.8275	0.0115641	up
ENSG00000280392	-8.29381	0.011576	down
SLC36A3	7.96726	0.0115911	up
GCK	7.80923	0.0115976	up
CFAP298-TCP10L	1.01476	0.011614	up
ENSG00000236674	9.85071	0.0116367	up
CHRNA4	3.72265	0.0116638	up
ENSG00000240513	12.5912	0.0116809	up
ENSG00000286864	9.93633	0.0116931	up
ENSG00000286883	1.75876	0.0117097	up
SOCS5P3	9.55	0.0118255	up
CCDC13-AS2	10.2113	0.0119188	up
MIR6859-1	-3.34338	0.0119309	down
SMPD5	4.60608	0.0119549	up
LINC01471	7.50344	0.0119878	up
KLHL40	9.03222	0.0119878	up
LAG3	1.10123	0.0120235	up
ABHD17AP4	10.4304	0.0120581	up
SLC6A3	8.1149	0.0120746	up
ENSG00000267501	10.6668	0.0121205	up
ENSG00000287078	5.24446	0.012151	up
EPB41L1-AS1	8.15729	0.0121566	up
GMCL2	3.81948	0.0121749	up
ENSG00000225279	2.97585	0.0121881	up
RNF224	2.4237	0.012199	up
ENSG00000233775	11.1621	0.0122158	up
ENSG00000286496	7.73425	0.0122323	up
LINC02613	7.83687	0.0122399	up
ATP1B4	8.03556	0.0122399	up
KRT17P8	10.4313	0.0122323	up
ENSG00000267245	11.6847	0.0122399	up
SLC47A1P1	3.23424	0.0122726	up
NMNAT2	1.74321	0.0122781	up
LINC01121	4.11358	0.0122763	up
CASR	6.59573	0.0122925	up
ENSG00000258210	-3.30996	0.0123454	down
DUTP6	-11.209	0.0123587	down
PLPP2	-1.12073	0.0123843	down
GAPDHP22	3.48061	0.0123993	up
ENSG00000286148	2.29929	0.0124152	up
CCL5	-1.31331	0.0124596	down
FBXO34-AS1	3.12986	0.0124584	up
THBS1-AS1	-3.97808	0.0125165	down
PRR7-AS1	2.26356	0.012535	up
ENSG00000263893	-3.36843	0.0125711	down
ENSG00000278949	-2.26744	0.0125762	down
ENSG00000274184	4.30409	0.0125892	up
TNFAIP6	-5.54587	0.0126119	down
KISS1R	3.53612	0.0126299	up
ENSG00000286366	1.6881	0.0126675	up
KCNB1	1.16665	0.0126969	up
TEX26-AS1	7.55353	0.0127265	up
TUBG1P	9.75183	0.0127265	up
RPS20P22	1.111	0.0127289	up
ANKRD66	8.39617	0.0127599	up
ENSG00000278399	-10.5616	0.0127896	down
JPH4	2.89456	0.0129007	up
KRT8P41	9.66772	0.0129134	up
ENSG00000264968	10.6605	0.0129272	up
ATP2A1	1.32906	0.0130159	up
ENSG00000254867	3.5791	0.0130473	up
STKLD1	1.41508	0.0130721	up
CDNF	1.14533	0.0131089	up
C10orf95	-9.48328	0.0131491	down
DYNLL2-DT	2.83477	0.0132379	up
MAP3K19	3.59933	0.013252	up
ENSG00000279838	-1.14871	0.0133371	down
TMEM44-AS2	-2.70617	0.0133742	down
TGM3	-9.39994	0.0133981	down
ADAMTS17	-7.04227	0.0133952	down
ENSG00000229519	-4.31623	0.0133983	down
KRT8P11	3.46747	0.0133976	up
ENSG00000273243	-1.95022	0.0134079	down
SNORA22B	-4.79193	0.0134848	down
ST8SIA5	2.68396	0.0135055	up
DNAH5	-1.07267	0.0135246	down
ZNF295-AS1	2.1244	0.0135578	up
ENSG00000223374	-3.32355	0.0135722	down
EVX2	8.51038	0.0135771	up
ENSG00000270060	-2.31426	0.0135865	down
NEURL1	1.12664	0.0135855	up
TMEM9B-AS1	1.16083	0.0135916	up
CFAP206	2.57709	0.0135937	up
CYP2E1	1.47051	0.0135969	up
DIRAS3	3.4123	0.0135993	up
CHMP4BP1	2.43841	0.0136136	up
KRTAP20-4	2.06825	0.0136504	up
ENSG00000227218	2.4324	0.0138553	up
ENSG00000259672	9.15492	0.0138706	up
GLOD5	9.95419	0.0138706	up
AK3P5	-3.68078	0.0138821	down
ST8SIA3	7.20585	0.0139082	up
RAB17-DT	1.40147	0.0139384	up
TRIM55	8.56152	0.0139397	up
ENSG00000228554	-10.4399	0.0139788	down
IRGC	9.46867	0.013984	up
VTRNA1-2	13.6094	0.0139968	up
TPTE	1.11316	0.0140341	up
SLC2A3P4	9.6666	0.0140904	up
LINC02485	10.1345	0.0140904	up
C1QBPP2	3.33222	0.014142	up
ENSG00000271664	-2.59846	0.0141718	down
GPR22	8.22174	0.014171	up
LINC02235	8.04081	0.014181	up
PKHD1L1	5.85332	0.0141878	up
RPL32P6	11.4815	0.0141878	up
ENSG00000253829	-11.492	0.0141905	down
DNM1P41	2.28775	0.0141932	up
PITRM1-AS1	-2.0832	0.014212	down
BMP6	-1.35883	0.0142152	down
XPC-AS1	-1.01451	0.0142101	down
CACNA1C	2.36383	0.0142044	up
ENSG00000272444	3.43218	0.0142168	up
MSS51	-1.81533	0.0142481	down
ENSG00000287780	1.93646	0.0142855	up
IL16	2.97293	0.0142983	up
DAPP1	1.75754	0.0143571	up
ODCP	1.58972	0.0143719	up
ENSG00000286195	3.73579	0.0143836	up
NTF4	3.74599	0.0143871	up
ST3GAL1P1	-3.48392	0.0143909	down
ENSG00000268912	1.7036	0.0143991	up
GRIN3A	-1.1029	0.0144318	down
ENSG00000286104	1.66402	0.0144669	up
ENSG00000258515	-2.99575	0.0145045	down
ENSG00000280425	3.0146	0.0145336	up
ENSG00000279933	8.0478	0.0145784	up
ENSG00000260808	-1.9789	0.0145876	down
ENSG00000272682	3.42702	0.0145976	up
LINC01647	10.207	0.014619	up
SPN	7.72108	0.0146238	up
ENSG00000286677	3.50348	0.0146325	up
LINC00707	6.87247	0.0146387	up
ENSG00000258559	-1.90936	0.0146457	down
SLCO1B7	9.1205	0.0146459	up
ENSG00000289302	3.59942	0.0146752	up
ACTBP15	10.4819	0.0147028	up
ENSG00000286163	-10.3054	0.0147484	down
CTRC	8.34194	0.0147824	up
ENSG00000288832	9.49502	0.0147892	up
LILRB3	3.02661	0.0148745	up
DACT1	1.26463	0.0148816	up
RCC2P5	9.51067	0.0148894	up
ENSG00000280422	3.90716	0.0148932	up
ENSG00000255641	-10.7911	0.0149061	down
ENSG00000274292	1.089	0.0149402	up
ENSG00000279110	2.77277	0.0149398	up
SNORD62B	-1.161	0.0149539	down
ENSG00000286629	-9.52231	0.015032	down
IGSF3P2	-8.70571	0.0150503	down
MMP3	-8.55397	0.0150438	down
ATP6V0E2-AS1	1.61267	0.0150661	up
ENSG00000260293	2.12226	0.0151018	up
ENSG00000254929	1.19847	0.0151118	up
ENSG00000223901	-1.62317	0.0151245	down
ENSG00000259921	1.83125	0.0151338	up
AOC4P	1.08532	0.0151452	up
VTCN1	2.3388	0.0151577	up
RNF148	1.97525	0.015249	up
VHLL	3.29716	0.0153147	up
PMS2P10	1.91364	0.0153435	up
ENSG00000236015	-1.4857	0.0153581	down
ENSG00000283999	10.3083	0.0153933	up
AARSD1P1	-10.1586	0.0154268	down
NKAPP1	1.43423	0.015439	up
MUC6	1.79922	0.0154634	up
IL17B	3.07906	0.0154667	up
SLC26A10	1.93175	0.0155043	up
NPPC	10.4736	0.0155927	up
ALOXE3	2.24268	0.0156029	up
ENSG00000286621	-9.18163	0.0156607	down
ENSG00000288208	5.47924	0.0156825	up
TGFBR3L	2.37946	0.0156929	up
ENSG00000273184	-11.2968	0.0157121	down
DLX2-DT	-10.4437	0.0157211	down
INKA2-AS1	1.4952	0.0157256	up
HTR7P1	1.4502	0.0157451	up
NT5C1A	7.02433	0.0157577	up
FAM184B	1.10744	0.0158033	up
ENSG00000274751	3.50377	0.0158391	up
LINC00881	3.6453	0.0158891	up
PAOX	1.13243	0.0159147	up
DAO	1.76666	0.0159202	up
ENSG00000289474	-3.23716	0.0159782	down
PRAMENP	8.58014	0.015978	up
GPR79	10.344	0.015978	up
RPL7AP63	2.69741	0.016141	up
ENSG00000233755	10.2903	0.0161585	up
HCAR2	-1.02203	0.0162342	down
[truncated: 891 more rows]
