# Supplementary material for: Phenethyl isothiocyanate inhibits the carcinogenic properties of hepatocellular carcinoma Huh7.5.1 cells by activating MAPK/PI3K-Akt/p53 signaling pathways
Source: PeerJ. 2024 Jun 10;12:e17532. doi: 10.7717/peerj.17532 (PMC11172670; doi:10.7717/peerj.17532)
Supplement: Supplemental Information 3 [file peerj-12-17532-s003.xlsx]

## Sheet: Table S3
Table S3. Differentially expressed genes enriched in the MAPK and PI3K-Akt signaling pathways in Huh7.5.1 cells treated with or without PEITC based on KEGG analysis.
Signaling pathways	Genes	log2 (Fold change (FC))	p-value	Regulation
MAPK signaling pathway	HSPA1L	2.50418	1.07993e-44	up
	FOS	1.94577	3.69665e-39	up
	HSPA6	4.33309	5.56934e-26	up
	MAP3K14	1.29473	1.37771e-20	up
	DDIT3	1.47635	1.55799e-20	up
	PLA2G4C	2.1742	4.78513e-12	up
	EFNA4	-1.02241	8.99982e-11	down
	VEGFD	2.3338	4.57632e-09	up
	GADD45G	1.91662	5.28927e-08	up
	CSF1R	3.47674	1.86322e-07	up
	AREG	-1.02536	5.06553e-06	down
	PTPN5	9.47527	7.87566e-06	up
	NTF3	1.58255	1.25543e-05	up
	MAPK8IP2	1.2959	1.37647e-05	up
	CACNA1B	8.4768	1.88556e-05	up
	RASGRP2	1.28736	4.45983e-05	up
	FLT4	8.32704	0.000112563	up
	FLT3	9.28653	0.000271312	up
	CACNA1F	8.3843	0.000332111	up
	FGF21	10.6899	0.0005822	up
	CACNA2D2	1.68944	0.0039664	up
	RASGRP4	3.87598	0.0101156	up
	CACNA1C	2.36383	0.0142044	up
	NTF4	3.74599	0.0143871	up
	FGF6	9.58205	0.0193741	up
	PRKCG	8.36198	0.0215015	up
	FGF10	-7.27812	0.0417855	down
PI3K-Akt signaling pathway	DDIT4	1.2317	4.21455e-15	up
	EFNA4	-1.02241	8.99982e-11	down
	G6PC2	11.9174	1.87043e-10	up
	VEGFD	2.3338	4.57632e-09	up
	CSF1R	3.47674	1.86322e-07	up
	SPP1	-1.11965	5.87613e-07	down
	OSM	11.084	1.56262e-06	up
	AREG	-1.02536	5.06553e-06	down
	TNXB	2.15101	5.98143e-06	up
	NTF3	1.58255	1.25543e-05	up
	FLT4	8.32704	0.000112563	up
	FLT3	9.28653	0.000271312	up
	ITGA2B	3.65489	0.00028393	up
	FGF21	10.6899	0.0005822	up
	IL3RA	3.09889	0.00227706	up
	ITGA9	2.37997	0.00305524	up
	GNG11	-1.19328	0.0088576	down
	NTF4	3.74599	0.0143871	up
	CHAD	1.13336	0.0170529	up
	FGF6	9.58205	0.0193741	up
	IL6	-3.3663	0.0196021	down
	COL9A1	7.06022	0.0206062	up
	LAMC3	7.01935	0.0322244	up
	ITGB7	3.77406	0.0344119	up
	FGF10	-7.27812	0.0417855	down
