# Supplementary material for: Phenethyl isothiocyanate inhibits the carcinogenic properties of hepatocellular carcinoma Huh7.5.1 cells by activating MAPK/PI3K-Akt/p53 signaling pathways
Source: PeerJ. 2024 Jun 10;12:e17532. doi: 10.7717/peerj.17532 (PMC11172670; doi:10.7717/peerj.17532)
Supplement: Supplemental Information 4 [file peerj-12-17532-s004.xlsx]

## Sheet: Table S4
Table S4. The core enrichment genes in hallmarks E2F targets, PI3K-Akt-mTOR signaling and p53 pathway in Huh7.5.1 cells treated with PEITC based on GSEA.
Hallmark gene sets	Genesa	Rank metric scores	Running ES	Core enrichment
PI3K-Akt signaling	PFN1	21.25	0.0083	Yes
	CALR	6.683	0.0119	Yes
	DDIT3*	6.333	0.0209	Yes
	AKT1S1	4.95	0.028	Yes
	NFKBIB	3.68	0.0326	Yes
	ARPC3	3.54	0.0413	Yes
	PPP1CA	3.153	0.0477	Yes
	RPS6KA3	3.113	0.0572	Yes
	ACACA	2.81	0.0636	Yes
	GRK2	2.217	0.0647	Yes
	TRAF2	2.087	0.0724	Yes
	MAPKAP1	2.057	0.0816	Yes
	CSNK2B	1.963	0.089	Yes
	CLTC	1.947	0.0984	Yes
	ATF1	1.76	0.1038	Yes
	CDKN1A	1.23	0.0947	Yes
	PAK4	1.157	0.1007	Yes
	PIK3R3	1.133	0.1091	Yes
	PLCB1	1.077	0.1157	Yes
	RIT1	0.947	0.1169	Yes
	RALB	0.943	0.1261	Yes
	MAP2K3	0.91	0.1338	Yes
	ITPR2	0.88	0.1412	Yes
	PPP2R1B	0.787	0.1422	Yes
	UBE2D3	0.653	0.1363	Yes
	HSP90B1	0.577	0.136	Yes
	STAT2	0.547	0.1413	Yes
	ECSIT	0.523	0.1473	Yes
	PLCG1	0.52	0.1562	Yes
	NCK1	0.507	0.1635	Yes
	MAP3K7	0.5	0.1721	Yes
	RPS6KA1	0.493	0.1808	Yes
	PIN1	0.44	0.1808	Yes
	HRAS	0.41	0.1827	Yes
	CFL1	0.403	0.1903	Yes
	TBK1	0.39	0.1975	Yes
	CDK4	0.377	0.2027	Yes
	TSC2	0.33	0.1992	Yes
	PRKAR2A	0.327	0.2087	Yes
	VAV3	0.287	0.2057	Yes
	ACTR3	0.283	0.2134	Yes
	MAP2K6	0.28	0.2217	Yes
	PLA2G12A	0.25	0.2208	Yes
	SFN	0.227	0.2187	Yes
	NOD1	0.213	0.2228	Yes
	PITX2	0.207	0.2285	Yes
P53 signaling pathway	RPS12	57.877	0.0045	Yes
	FOS*	9.063	0.0052	Yes
	DDIT4*	8.61	0.01	Yes
	EPHA2	8.06	0.0145	Yes
	PPP1R15A	7.497	0.0188	Yes
	RPL18	7.39	0.0237	Yes
	S100A10	7.26	0.0286	Yes
	RPL36	6.37	0.0324	Yes
	DDIT3*	6.333	0.0375	Yes
	BTG2	5.003	0.0401	Yes
	JUN	4.587	0.0437	Yes
	SLC3A2	4.28	0.0478	Yes
	RAD9A	3.997	0.0517	Yes
	MXD1*	3.94	0.0566	Yes
	DCXR	3.883	0.0613	Yes
	HBEGF*	3.81	0.0659	Yes
	POM121	3.607	0.0697	Yes
	ATF3*	3.55	0.0745	Yes
	FOXO3	3.347	0.0778	Yes
	HEXIM1	3.323	0.0827	Yes
	IP6K2	3.243	0.0871	Yes
	VAMP8	3.21	0.0919	Yes
	CSRNP2	2.603	0.0904	Yes
	IER5	2.577	0.0952	Yes
	GADD45A	2.367	0.0969	Yes
	CCNG1	2.313	0.1013	Yes
	RACK1	2.247	0.1051	Yes
	H2AJ	2.17	0.1091	Yes
	XPC	2.153	0.1137	Yes
	TP53	2.007	0.1163	Yes
	HDAC3	1.94	0.1198	Yes
	TGFB1	1.937	0.1248	Yes
	TSPYL2	1.8	0.1267	Yes
	BAX	1.75	0.1306	Yes
	PPM1D*	1.637	0.1324	Yes
	BAK1	1.627	0.1371	Yes
	TRAFD1	1.593	0.1412	Yes
	SERTAD3	1.453	0.1421	Yes
	PLK2	1.257	0.1386	Yes
	CDKN1A	1.23	0.1423	Yes
	DRAM1	1.22	0.1471	Yes
	SPHK1	1.09	0.1451	Yes
	CDK5R1	1.07	0.149	Yes
	CDKN2A	1.05	0.1526	Yes
	KLF4	1.043	0.1572	Yes
	TOB1	1.017	0.1609	Yes
	RNF19B	1.013	0.1656	Yes
	FUCA1	0.927	0.1649	Yes
	ELP1	0.88	0.1666	Yes
	PIDD1	0.833	0.1674	Yes
	TPRKB	0.817	0.1714	Yes
	BTG1	0.71	0.165	Yes
	ANKRA2	0.69	0.1678	Yes
	EI24	0.653	0.1678	Yes
	CCNK	0.633	0.1707	Yes
	SLC19A2	0.633	0.1755	Yes
	WWP1	0.627	0.1798	Yes
	RB1	0.563	0.1765	Yes
	FAM162A	0.543	0.1781	Yes
	CTSF	0.533	0.1817	Yes
	SESN1	0.53	0.1862	Yes
	ZFP36L1	0.527	0.1906	Yes
	PITPNC1	0.507	0.1924	Yes
	CTSD	0.493	0.1953	Yes
	JAG2	0.483	0.1984	Yes
	APAF1	0.47	0.2012	Yes
	ITGB4	0.46	0.2046	Yes
	EPS8L2	0.453	0.2088	Yes
	MAPKAPK3	0.45	0.2127	Yes
	HINT1	0.447	0.2169	Yes
	ABAT	0.433	0.2187	Yes
	SOCS1*	0.43	0.2233	Yes
	HSPA4L	0.427	0.2277	Yes
	KIF13B	0.417	0.2306	Yes
	RAD51C	0.417	0.2354	Yes
	HRAS	0.41	0.2385	Yes
	POLH	0.397	0.2403	Yes
	STEAP3	0.377	0.2405	Yes
	IRAG2	0.377	0.2453	Yes
	TSC22D1	0.37	0.2485	Yes
	DEF6	0.36	0.2506	Yes
	RGS16*	0.353	0.2539	Yes
	IRAK1	0.34	0.2558	Yes
	CDKN2AIP	0.327	0.2557	Yes
	RHBDF2	0.307	0.2548	Yes
	PMM1	0.303	0.2598	Yes
	TM7SF3	0.303	0.2636	Yes
	NOL8	0.28	0.262	Yes
	RCHY1	0.273	0.2636	Yes
E2F Targets	HMGA1	20.087	0.0035	Yes
	NME1	14.59	0.0075	Yes
	CDC20	11.837	0.0116	Yes
	SPAG5	10.857	0.0163	Yes
	CSE1L	9.13	0.0203	Yes
	UBE2S	7.49	0.0237	Yes
	XRCC6	6.727	0.0278	Yes
	PA2G4	6.443	0.0323	Yes
	RANBP1	5.603	0.0359	Yes
	MELK	5.113	0.0402	Yes
	CDC25A	4.977	0.0448	Yes
	POLD1	4.947	0.0497	Yes
	AURKA	4.153	0.052	Yes
	DDX39A	3.607	0.0542	Yes
	KIF18B	3.467	0.0584	Yes
	HNRNPD	3.27	0.0618	Yes
	LYAR	3.113	0.0654	Yes
	TUBG1	2.953	0.0691	Yes
	CKS1B	2.577	0.0695	Yes
	RACGAP1	2.337	0.0708	Yes
	DCTPP1	2.26	0.0744	Yes
	MLH1	2.153	0.0779	Yes
	RFC1	2.147	0.0828	Yes
	ORC2	2.107	0.087	Yes
	TBRG4	2.03	0.0909	Yes
	SRSF1	2.017	0.0957	Yes
	TP53	2.007	0.1005	Yes
	NUP205	1.99	0.105	Yes
	STMN1	1.9	0.1076	Yes
	SMC4	1.867	0.112	Yes
	NCAPD2	1.86	0.1169	Yes
	RPA1	1.823	0.1212	Yes
	CDC25B	1.813	0.1261	Yes
	CHEK2	1.78	0.1305	Yes
	RPA2	1.727	0.1342	Yes
	HMMR	1.723	0.1391	Yes
	ATAD2	1.67	0.1426	Yes
	CENPM	1.67	0.1476	Yes
	SSRP1	1.643	0.1518	Yes
	PPM1D*	1.637	0.1566	Yes
	RAD51AP1	1.627	0.1614	Yes
	TACC3	1.613	0.166	Yes
	JPT1	1.573	0.17	Yes
	PLK1	1.47	0.1718	Yes
	DNMT1	1.343	0.1723	Yes
	HELLS	1.34	0.1772	Yes
	PAN2	1.317	0.1813	Yes
	ZW10	1.283	0.1841	Yes
	NUP153	1.283	0.1891	Yes
	CTPS1	1.27	0.1936	Yes
	RNASEH2A	1.267	0.1985	Yes
	CDKN1A	1.23	0.2017	Yes
	NUP107	1.227	0.2066	Yes
	POLA2	1.103	0.2053	Yes
	CDKN2A	1.05	0.2068	Yes
	STAG1	0.987	0.2077	Yes
	E2F8	0.987	0.2127	Yes
	DONSON	0.967	0.2168	Yes
	RFC2	0.877	0.2155	Yes
	SHMT1	0.873	0.2203	Yes
	PRDX4	0.863	0.2242	Yes
	AK2	0.857	0.2286	Yes
	NAP1L1	0.837	0.2317	Yes
	DSCC1	0.817	0.2356	Yes
	ASF1B	0.803	0.2391	Yes
	XPO1	0.79	0.2427	Yes
	ESPL1	0.783	0.2473	Yes
	HUS1	0.767	0.2503	Yes
	EZH2	0.767	0.2553	Yes
	CCNB2	0.763	0.2598	Yes
	RAD50	0.76	0.2647	Yes
	DUT	0.757	0.2693	Yes
	NAA38	0.727	0.2708	Yes
	POLD2	0.667	0.269	Yes
	CDKN3	0.65	0.272	Yes
	DLGAP5	0.64	0.2753	Yes
	CENPE	0.623	0.2783	Yes
	EED	0.62	0.2829	Yes
	RBBP7	0.583	0.2829	Yes
	SPC25	0.563	0.2857	Yes
	RPA3	0.557	0.2891	Yes
	PDS5B	0.527	0.2897	Yes
	BARD1	0.517	0.293	Yes
	PSIP1	0.48	0.2919	Yes
	SPC24	0.443	0.2899	Yes
	TRA2B	0.443	0.2947	Yes
	MMS22L	0.43	0.2971	Yes
	BIRC5	0.42	0.2992	Yes
	RAD51C	0.417	0.3039	Yes
	BRCA1	0.413	0.3076	Yes
	SMC6	0.407	0.3113	Yes
	MSH2	0.4	0.3147	Yes
* Differentially expressed genes in Huh7.5.1 cells treated with or without PEITC.
