# Supplementary material for: Phenethyl isothiocyanate inhibits the carcinogenic properties of hepatocellular carcinoma Huh7.5.1 cells by activating MAPK/PI3K-Akt/p53 signaling pathways
Source: PeerJ. 2024 Jun 10;12:e17532. doi: 10.7717/peerj.17532 (PMC11172670; doi:10.7717/peerj.17532)
Supplement: Supplemental Information 5 [file peerj-12-17532-s005.xlsx]

## Sheet: Sheet1
Supplementary_Table5. MIQE checklist for authors, reviewers and editors.
ITEM TO CHECK	IMPORTANCE	CHECKLIST
EXPERIMENTAL DESIGN
Definition of experimental and control groups	E	line 222
Number within each group	E	line 222
Assay carried out by core lab or investigator's lab?	D
Acknowledgement of authors' contributions	D
SAMPLE
Description	E	line 221
Volume/mass of sample processed	D	Not applicable
Microdissection or macrodissection	E	Not applicable
Processing procedure	E	Not applicable
If frozen - how and how quickly?	E	Not applicable
If fixed - with what, how quickly?	E	Not applicable
Sample storage conditions and duration (especially for FFPE samples)	E	Not applicable
NUCLEIC ACID EXTRACTION
Procedure and/or instrumentation	E	line 223
Name of kit and details of any modifications	E	line 223
Source of additional reagents used	D	Not applicable
Details of DNase or RNAse treatment	E	line 223
Contamination assessment (DNA or RNA)	E	line 224
Nucleic acid quantification	E	line 225
Instrument and method	E	line 225
Purity (A260/A280)	D	line 225
Yield	D
RNA integrity method/instrument	E	line 226
RIN/RQI or Cq of 3' and 5' transcripts	E	line 227
Electrophoresis traces	D
SAMPLE
Exact chemical constitution of the buffer	D
Additives (SYBR Green I, DMSO, etc.)	E	line 232
Manufacturer of plates/tubes and catalog number	D
Complete thermocycling parameters	E	line 236
Reaction setup (manual/robotic)	D
Manufacturer of qPCR instrument	E	line 235
qPCR VALIDATION
Evidence of optimisation (from gradients)	D
Specificity (gel, sequence, melt, or digest)	E	line 237
For SYBR Green I, Cq of the NTC	E	line 246
Standard curves with slope and y-intercept	E	line 237
PCR efficiency calculated from slope	E	line 241
Confidence interval for PCR efficiency or standard error	D
r2 of standard curve	E	line 241
Linear dynamic range	E	line 242
Cq variation at lower limit	E	line 242
Confidence intervals throughout range	D
Evidence for limit of detection	E	line 242
If multiplex, efficiency and LOD of each assay.	E	Not applicable
DATA ANALYSIS
qPCR analysis program (source, version)	E	line 244
Cq method determination	E	line 244
Outlier identification and disposition	E	line 245
Results of NTCs	E	line 246
Justification of number and choice of reference genes	E	line 239
Description of normalisation method	E	line 239
Number and concordance of biological replicates	D
Number and stage (RT or qPCR) of technical replicates	E	line 240
Repeatability (intra-assay variation)	E	line 246
Reproducibility (inter-assay variation, %CV)	D
Power analysis	D
Statistical methods for result significance	E	line 250
Software (source, version)	E	line 250
Cq or raw data submission using RDML	D
